# Supplementary material
Source: Research Square preprint supplement (doi:10.21203/rs.3.rs-9401375/v1)
Supplement: Supplementary file 1 [file 369c62227df14fd7c5a5e856.pdf]

## SUPPLEMENTARY MATERIAL

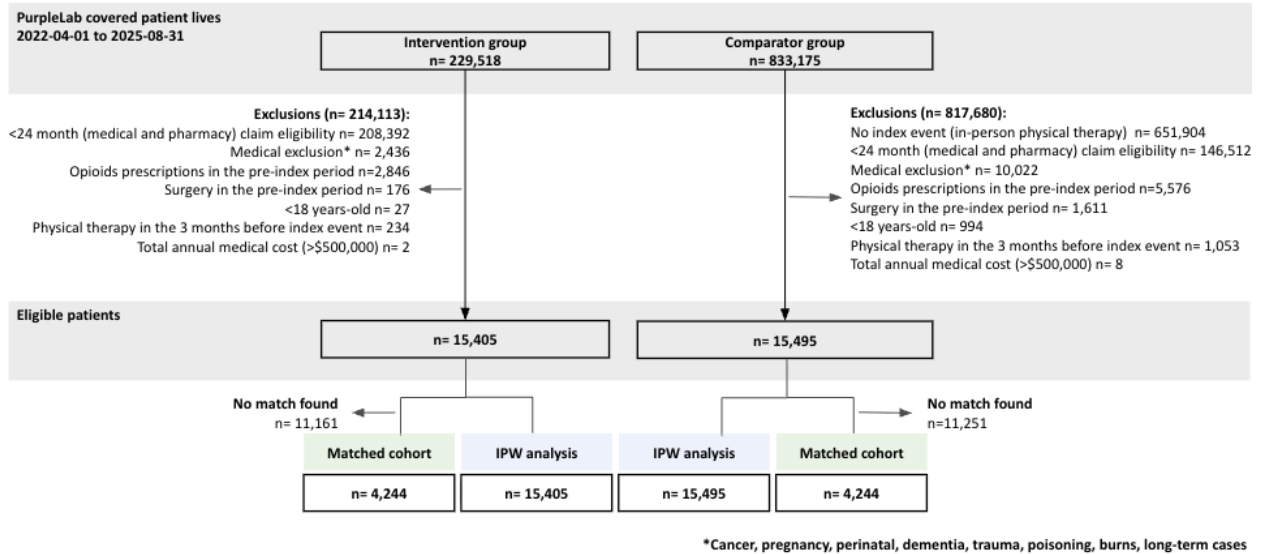

**Supplementary Figure 1.** Flowchart of the study following the STROBE Statement (Strengthening the Reporting of Observational Studies in Epidemiology) guidelines.

**Abbreviations:** IPW, Inverse Probability Weighting.

**Supplementary Table 1.** Baseline covariates included in the propensity score model used for inverse probability weighting and propensity score matching analyses.

| Variables                               | Type        | Description                                                                                                                                    | Rationale for inclusion                                                                                                |
|-----------------------------------------|-------------|------------------------------------------------------------------------------------------------------------------------------------------------|------------------------------------------------------------------------------------------------------------------------|
| Sex                                     | Categorical | Female; Male                                                                                                                                   | To account for differences in care access, cost structures, and treatment patterns.                                    |
| Age                                     | Categorical | 18-40; 41-64; 65+                                                                                                                              |                                                                                                                        |
| Geographic region                       | Categorical | Midwest, Northeast, South, West                                                                                                                |                                                                                                                        |
| Social Deprivation Index <sup>1,2</sup> | Categorical | 0-20; 21-40; 41-60; 61-80; 81-100                                                                                                              | To reflect the impact of social determinants of health.                                                                |
| MSK symptomatic anatomical site         | Categorical | Spine (low back, upper back, neck)<br>Lower limb (lower limb, hip, knee, ankle, foot)<br>Upper limb (upper limb, shoulder, wrist, hand, elbow) | To reflect clinical presentation, influencing care needs                                                               |
| Concurrent MSK conditions               | Categorical | 0; 1+                                                                                                                                          | To account for multimorbidity within MSK conditions, which may influence treatment intensity and prescribing patterns. |
| Weighted Elixhauser Comorbidity Index   | Continuous  | Weighted score calculated based on ICD-10 codes <sup>3,4</sup>                                                                                 | To account for general multimorbidity and overall health status and chronic disease complexity                         |
| Pre-index TCOC*                         | Continuous  | Total healthcare costs for any cause                                                                                                           | To account for overall health status and patient preferences in treatment-seeking behavior                             |

**Abbreviations:** MSK, Musculoskeletal; TCOC, Total all-cause costs of care.

**Note:** \*All costs were standardized using the Centers for Medicare & Medicaid Services (CMS) Fee Schedules and expressed in 2025 U.S. dollars.

Standardized mean differences before and after inverse probability weighting

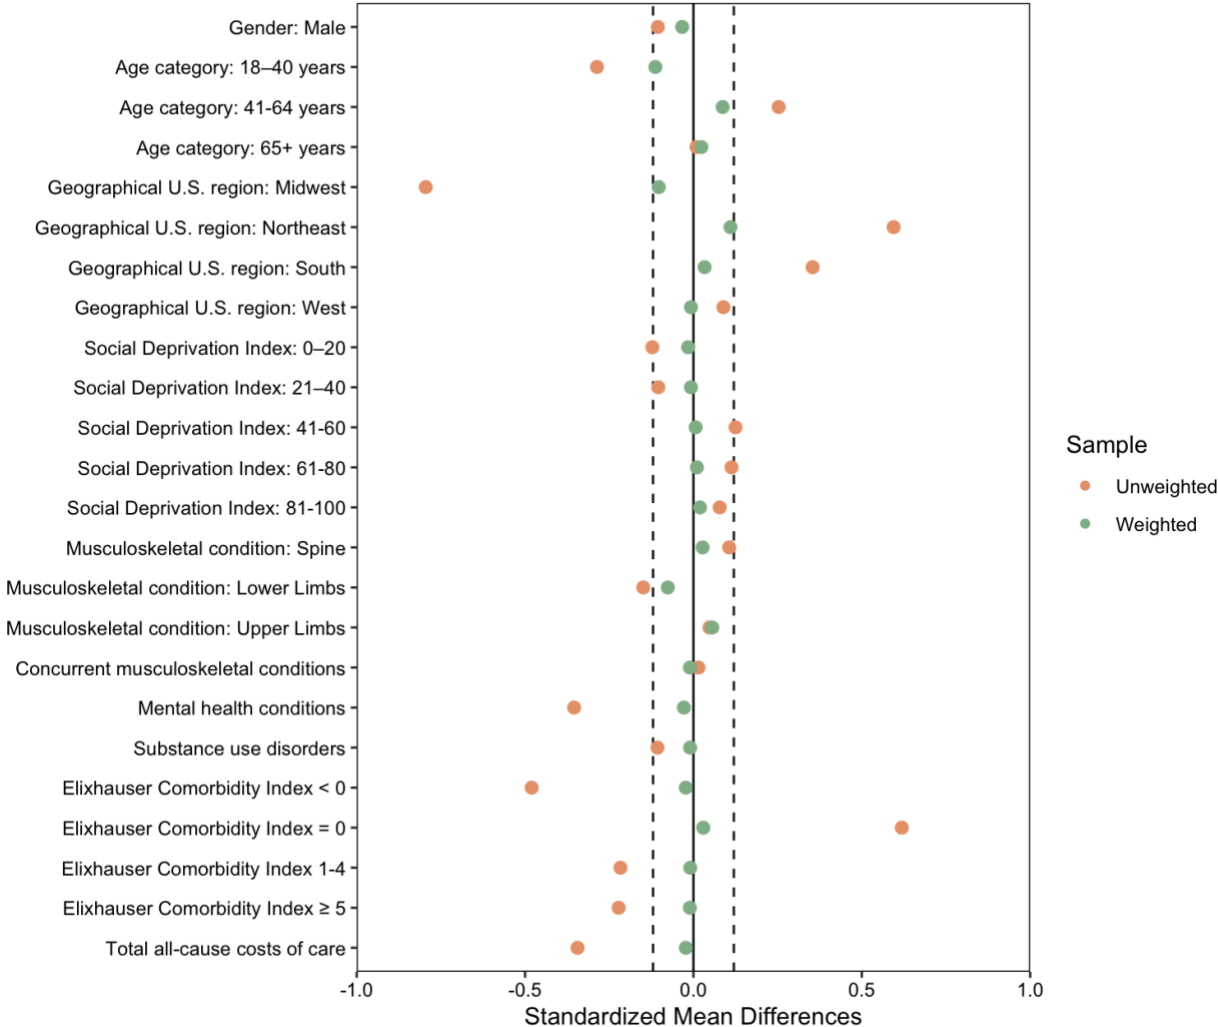

**Supplementary Figure 2.** Standardized mean differences (SMDs) for baseline characteristics before and after inverse probability weighting.

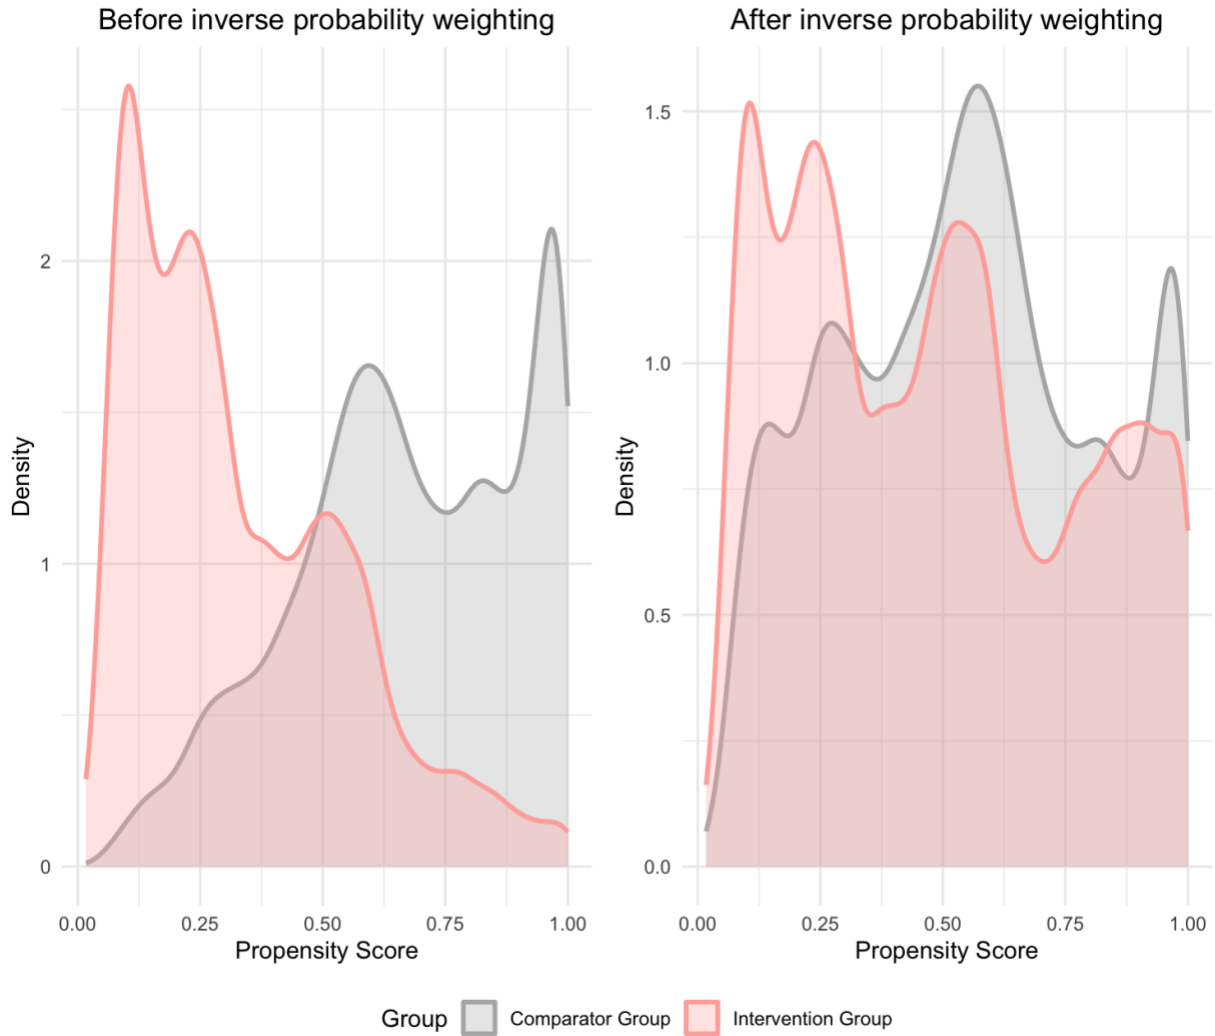

**Supplementary Figure 3.** Distribution of propensity scores before and after inverse probability weighting.

**Supplementary Table 2.** Baseline characteristics of the intervention group (AI Care Program) and the comparator group (in-person physical therapy) in the unweighted (pre-weighting) cohort.

|                                                | Unweighted Cohort                |                                |
|------------------------------------------------|----------------------------------|--------------------------------|
|                                                | Intervention Group<br>(N=15,405) | Comparator Group<br>(N=15,495) |
| <b>Demographic characteristics</b>             |                                  |                                |
| <b>Sex, N (%):</b>                             |                                  |                                |
| Female                                         | 9,028 (58.6)                     | 8,270 (53.4)                   |
| Male                                           | 6,377 (41.4)                     | 7,225 (46.6)                   |
| <b>Age categories (years), N (%):</b>          |                                  |                                |
| 18-40                                          | 3,049 (19.8)                     | 3,088 (19.7)                   |
| 41-64                                          | 10,567 (68.6)                    | 8,745 (56.4)                   |
| +65                                            | 1,789 (11.6)                     | 1,755 (11.3)                   |
| <b>Geographic U.S. Region, N (%):</b>          |                                  |                                |
| Midwest                                        | 5,483 (35.6)                     | 11,221 (72.4)                  |
| Northeast                                      | 3,651 (23.7)                     | 622 (4.0)                      |
| South                                          | 4,528 (29.4)                     | 2,312 (14.9)                   |
| West                                           | 1,743 (11.3)                     | 1,340 (8.6)                    |
| <b>Social Deprivation Index, N (%):</b>        |                                  |                                |
| 0-20                                           | 4,990 (32.4)                     | 5,921 (38.4)                   |
| 21-40                                          | 3,891 (25.3)                     | 4,635 (29.9)                   |
| 41-60                                          | 3,053 (19.8)                     | 2,338 (15.1)                   |
| 61-80                                          | 2,204 (14.3)                     | 1,639 (10.6)                   |
| 81-100                                         | 1,267 (8.2)                      | 962 (6.2)                      |
| <b>Clinical data</b>                           |                                  |                                |
| <b>MSK symptomatic anatomical site, N (%):</b> |                                  |                                |
| Spine                                          | 6,661 (43.2)                     | 5,894 (38.0)                   |
| Lower Limb                                     | 5,165 (33.5)                     | 6,308 (40.7)                   |
| Upper Limb                                     | 3,579 (23.2)                     | 3,293 (21.3)                   |
| <b>Concurrent MSK conditions, N (%):</b>       |                                  |                                |
| 0                                              | 12,981 (84.3)                    | 13,141 (84.8)                  |
| 1+                                             | 2,424 (15.7)                     | 2,354 (15.2)                   |

| <b>Unweighted Cohort</b>                       |                                         |                                       |
|------------------------------------------------|-----------------------------------------|---------------------------------------|
|                                                | <b>Intervention Group</b><br>(N=15,405) | <b>Comparator Group</b><br>(N=15,495) |
| <b>Elixhauser Comorbidity Index, mean (SD)</b> | -0.1 (1.6)                              | -0.3 (3.1)                            |
| <b>Elixhauser Comorbidity Index, N (%):</b>    |                                         |                                       |
| <0                                             | 956 (6.2)                               | 3,504 (22.6)                          |
| 0                                              | 14,114 (91.6)                           | 10,515 (67.9)                         |
| 1-4                                            | 169 (1.1)                               | 731 (4.7)                             |
| >5                                             | 166 (1.1)                               | 745 (4.8)                             |
| <b>TCOC, mean (SD) (\$)</b>                    | 746.2 (4,784.2)                         | 3,981.8 (12,405.0)                    |

**Abbreviations:** MSK, musculoskeletal; TCOC, total all-cause costs of care,

**Supplementary Table 3.** Comparison of opioid utilization outcomes between intervention and comparator groups using a broader definition of opioid initiation ( $\geq 1$  prescription), in the inverse probability weighted sample, adjusted for baseline covariates.

| <b>Outcomes</b>                              | <b>Intervention group</b>      | <b>Comparator group</b>         | <b>Absolute Difference</b> |        |
|----------------------------------------------|--------------------------------|---------------------------------|----------------------------|--------|
|                                              | ESS = 8,977.1<br>Mean (95% CI) | ESS = 10,590.1<br>Mean (95% CI) | Mean (95% CI)              | p      |
| <b>Opioid initiation rates, %</b>            | 3.7 (3.1; 4.5)                 | 7.4 (6.1; 8.8)                  | 3.7 (2.9; 4.3)             | <0.001 |
| <b>Multiple prescriptions rates, %</b>       | 0.9 (0.6; 1.3)                 | 2.3 (1.7; 3.2)                  | 1.4 (0.9; 1.8)             | <0.001 |
| <b>Opioid prescriptions per 100 patients</b> | 8.0 (4.9; 12.9)                | 16.7 (10.3; 27.1)               | 8.7 (4.1; 13.3)            | 0.001  |

**Abbreviations:** CI, confidence interval.

**Supplementary Table 4.** Comparison of unweighted (crude) opioid utilization outcomes between intervention and comparator groups ( $\geq 1$  prescription).

| Outcomes                              | Intervention group<br>N = 15,405<br>Mean (95% CI) | Comparator group<br>N = 15,495<br>Mean (95% CI) | Absolute Difference |        |
|---------------------------------------|---------------------------------------------------|-------------------------------------------------|---------------------|--------|
|                                       |                                                   |                                                 | Mean/pp (95% CI)    | p      |
| Opioid initiation rates, %            | 4.9 (4.5; 5.2)                                    | 9.4 (8.9; 9.8)                                  | 4.5 (3.9; 5.1)      | <0.001 |
| Multiple prescriptions rates, %       | 1.4 (1.2; 1.6)                                    | 3.5 (3.2; 3.8)                                  | 2.1 (1.8; 2.5)      | 0.025  |
| Opioid prescriptions per 100 patients | 7.9 (7.1; 8.6)                                    | 16.8 (15.6; 18.0)                               | 9.0 (7.6; 10.4)     | <0.001 |

**Abbreviations:** CI, confidence intervals; DEA, Drug Enforcement Administration; MMEs, morphine milligram equivalents.

**Supplementary Table 5.** Comparison of unweighted (crude) opioid utilization outcomes between intervention and comparator groups, using a more stringent definition of opioid initiation ( $\geq 2$  prescriptions or  $\geq 1$  prescription with higher-tablet counts).

| Outcomes                                     | Intervention group          | Comparator group            | Absolute Difference |        |
|----------------------------------------------|-----------------------------|-----------------------------|---------------------|--------|
|                                              | N = 15,405<br>Mean (95% CI) | N = 15,495<br>Mean (95% CI) | Mean/pp (95% CI)    | p      |
| <b>Opioid initiation rates, %</b>            | 2.9 (2.7;3.2)               | 5.1 (4.8; 5.5)              | 2.2 (1.8; 2.7)      | <0.001 |
| <b>Multiple prescriptions rates, %</b>       | 1.4 (1.2; 1.6)              | 3.0 (2.7; 3.2)              | 1.6 (1.3; 1.9)      | <0.001 |
| <b>Opioid prescriptions per 100 patients</b> | 5.9 (5.2; 6.7)              | 11.9 (10.9; 13.1)           | 6.1 (4.7; 7.4)      | <0.001 |

**Abbreviations:** CI, confidence intervals.

**Supplementary Table 6.** Subgroup analyses of opioid initiation rates in the inverse probability weighted sample, adjusted for baseline covariates, using a more stringent definition of opioid initiation ( $\geq 2$  prescriptions or  $\geq 1$  prescription with higher-tablet counts).

|                    | ESS     |          | Opioid initiation rates |                  |                                    |         | Opioid initiation odds ratio |                                  |
|--------------------|---------|----------|-------------------------|------------------|------------------------------------|---------|------------------------------|----------------------------------|
|                    | IG      | CG       | IG<br>% (95% CI)        | CG<br>% (95% CI) | Absolute difference<br>pp (95% CI) | p       | Odds ratio<br>(95% CI)       | Adjusted p<br>value <sup>1</sup> |
| <b>Sex</b>         |         |          |                         |                  |                                    |         |                              |                                  |
| Female             | 5,192.7 | 5,523.7  | 2.0 (1.5; 2.7)          | 3.2 (2.4; 4.3)   | 1.2 (0.8; 1.6)                     | < 0.001 | 0.63 (0.56; 0.70)            | < 0.001                          |
| Male               | 3,798.9 | 5,111.9  | 1.4 (1.1; 1.9)          | 3.3 (2.5; 4.4)   | 1.8 (1.3; 2.5)                     | < 0.001 | 0.42 (0.37; 0.49)            | < 0.001                          |
| <b>Age</b>         |         |          |                         |                  |                                    |         |                              |                                  |
| 18-40              | 1,739.2 | 3,595.8  | 1.1 (0.8; 1.6)          | 2.2 (1.6; 2.9)   | 1.0 (0.6; 1.5)                     | < 0.001 | 0.52 (0.41; 0.67)            | < 0.001                          |
| 41-64              | 6,333.1 | 5,982.1  | 2.4 (1.7; 3.0)          | 4.1 (3.1; 5.5)   | 1.9 (1.3; 2.5)                     | < 0.001 | 0.53 (0.47; 0.59)            | < 0.001                          |
| 65+                | 9,86.8  | 1,213.8  | 3.3 (2.4; 4.5)          | 5.5 (4.1; 7.3)   | 2.2 (1.2; 3.2)                     | < 0.001 | 0.59 (0.48; 0.72)            | < 0.001                          |
| <b>U.S. Region</b> |         |          |                         |                  |                                    |         |                              |                                  |
| Midwest            | 3,529.3 | 10,258.7 | 1.7 (1.3; 2.3)          | 3.6 (2.7; 4.8)   | 1.9 (1.3; 2.5)                     | < 0.001 | 0.46 (0.41; 0.52)            | < 0.001                          |
| Northeast          | 3,224.6 | 437.8    | 2.4 (1.7; 3.3)          | 2.1 (1.5; 3.0)   | -0.3 (-0.8; 0.3)                   | 0.386   | 1.12 (0.86; 1.46)            | 0.437                            |
| South              | 3,219.4 | 1,739.9  | 1.8 (1.3; 2.5)          | 3.0 (2.2; 4.1)   | 1.2 (0.7; 1.8)                     | < 0.001 | 0.59 (0.49; 0.72)            | < 0.001                          |
| West               | 1,151.0 | 1,049.1  | 1.6 (1.1; 2.3)          | 3.7 (2.7; 5.1)   | 2.1 (1.2; 3.0)                     | < 0.001 | 0.43 (0.32; 0.57)            | < 0.001                          |
| <b>SDI</b>         |         |          |                         |                  |                                    |         |                              |                                  |
| 0-20               | 2,902.0 | 4,290.0  | 1.6 (1.2; 2.2)          | 2.8 (2.1; 3.8)   | 1.2 (0.7; 1.6)                     | < 0.001 | 0.58 (0.50; 0.69)            | < 0.001                          |
| 21-40              | 2,289.3 | 3,519.7  | 1.4 (1.0; 1.9)          | 2.6 (1.9; 3.5)   | 1.2 (0.7; 1.7)                     | < 0.001 | 0.54 (0.45; 0.64)            | < 0.001                          |
| 41-60              | 1,938.8 | 1,502.2  | 2.0 (1.5; 2.8)          | 3.8 (2.8; 5.1)   | 1.7 (1.0; 2.4)                     | < 0.001 | 0.53 (0.43; 0.64)            | < 0.001                          |

|                                        |         |          |                |                |                |         |                   |         |
|----------------------------------------|---------|----------|----------------|----------------|----------------|---------|-------------------|---------|
| 61-80                                  | 1,262.4 | 1,002.1  | 1.9 (1.3; 2.6) | 4.2 (3.1; 5.7) | 2.4 (1.5; 3.3) | < 0.001 | 0.43 (0.34; 0.54) | < 0.001 |
| 81-100                                 | 706.1   | 653.7    | 1.9 (1.3; 2.7) | 2.8 (2.0; 4.0) | 0.9 (0.2; 1.7) | < 0.001 | 0.66 (0.48; 0.91) | 0.016   |
| <b>MSK symptomatic anatomical site</b> |         |          |                |                |                |         |                   |         |
| Spine                                  | 3,899.9 | 3,928.1  | 1.7 (1.3; 2.3) | 2.7 (2.0; 3.6) | 1.0 (0.6; 1.4) | < 0.001 | 0.64 (0.55; 0.74) | < 0.001 |
| Lower Limb                             | 2,986.0 | 4,452.6  | 1.8 (1.3; 2.4) | 4.1 (3.1; 5.4) | 2.4 (1.6; 3.3) | < 0.001 | 0.42 (0.36; 0.48) | < 0.001 |
| Upper Limb                             | 2,112.7 | 2,278.9  | 1.9 (1.4; 2.6) | 2.9 (2.2; 4.0) | 1.0 (0.5; 1.5) | < 0.001 | 0.65 (0.54; 0.78) | < 0.001 |
| <b>Mental health conditions, %:</b>    |         |          |                |                |                |         |                   |         |
| No                                     | 9,210.8 | 9,311.7  | 2.1 (1.6; 2.8) | 3.7 (2.8; 4.8) | 1.6 (1.1; 2.0) | < 0.001 | 0.56 (0.51; 0.61) | < 0.001 |
| Yes                                    | 314.0   | 1,623.8  | 1.0 (0.7; 1.5) | 3.4 (2.5; 4.7) | 2.4 (1.5; 3.3) | < 0.001 | 0.29 (0.21; 0.42) | < 0.001 |
| <b>Substance use disorders, %:</b>     |         |          |                |                |                |         |                   |         |
| No                                     | 9,013.5 | 1,0454.7 | 2.2 (1.9; 2.5) | 4.0 (3.5; 4.5) | 1.8 (1.5; 2.1) | <.001   | 0.54 (0.50; 0.59) | < 0.001 |
| Yes                                    | 32.7    | 149.4    | 0.4 (0.1; 0.9) | 3.7 (2.1; 6.4) | 3.3 (1.2; 5.4) | <.001   | 0.11 (0.02; 0.54) | 0.010   |

**Abbreviations:** CG, comparator group; CI, confidence interval; ESS, effective sample size; IG, intervention group; MSK, musculoskeletal; pp, percentage points; SDI, Social Deprivation Index.

**Note:** <sup>1</sup>To account for multiple comparisons, p-values were adjusted using the Benjamini–Hochberg.

**Supplementary Table 7.** Comparison of opioid prescribing patterns among opioid users using a broader definition of opioid initiation ( $\geq 1$  prescription), among opioid users in the inverse probability weighted sample, adjusted for baseline covariates.

| Outcomes                                                     | Intervention group           | Comparator group               | Absolute difference |        |
|--------------------------------------------------------------|------------------------------|--------------------------------|---------------------|--------|
|                                                              | ESS = 415.2<br>Mean (95% CI) | ESS = 1,015.3<br>Mean (95% CI) | Mean/pp (95% CI)    | p      |
| <b>MMEs per day</b>                                          | 35.5 (28.7; 43.9)            | 38.2 (30.9; 47.3)              | 2.7 (0.2; 5.1)      | 0.044  |
| <b>MMEs per day<sup>1</sup> rates</b>                        |                              |                                |                     |        |
| $\geq 50$                                                    | 17.8 (10.2; 29.2)            | 21.2 (12.5; 33.5)              | 3.3 (-1.2; 7.8)     | 0.159  |
| $\geq 90$                                                    | 2.1 (0.7; 5.9)               | 5.4 (2.2; 12.6)                | 3.3 (-0.3; 6.2)     | 0.044  |
| <b>Opioid potency relative to morphine<sup>2</sup> rates</b> |                              |                                |                     |        |
| Lower potency than morphine                                  | 33.3 (20.5; 49.2)            | 23.5 (13.7; 37.1)              | -9.9 (4.0; 15.7)    | 0.002  |
| Equivalent to morphine                                       | 27.7 (17.1; 41.5)            | 28.0 (17.9; 40.9)              | 0.3 (-5.8; 5.3)     | 0.921  |
| Greater potency than morphine                                | 39.6 (27.2; 53.6)            | 53.1 (39.8; 65.9)              | 13.4 (7.4; 19.5)    | <0.001 |
| <b>DEA Schedule classification<sup>3</sup> rates</b>         |                              |                                |                     |        |
| Schedule IV                                                  | 31.3 (18.9; 47.1)            | 22.8 (13.2; 36.4)              | 8.5 (2.7; 14.3)     | 0.007  |
| Schedule III                                                 | 0.0 (0.0; 0.0)               | 0.0 (0.0; 0.0)                 | 0.0 (0.0; 0.0)      | 0.159  |
| Schedule II                                                  | 67.6 (50.6; 80.9)            | 79.5 (66.0; 88.6)              | 11.9 (5.3; 18.6)    | 0.001  |

**Abbreviations:** CI, confidence interval; DEA, Drug Enforcement Administration; MME, morphine milligram equivalent.

**Note:** <sup>1</sup> MMEs were obtained by converting each dispensed opioid prescription using published conversion factors<sup>5-7</sup> based on opioid type, strength, and quantity dispensed (Supplementary Table 23). <sup>2</sup>Drug potency relative to morphine considering published equianalgesic dose conversion factors<sup>5-7</sup> (Supplementary Table 24). <sup>3</sup>Drug schedule categorized according to the U.S. DEA controlled substance schedules<sup>8,9</sup> (Supplementary Table 24).

**Supplementary Table 8.** Comparison of unweighted (crude) opioid utilization outcomes between intervention and comparator groups ( $\geq 1$  prescription), among opioid users.

| Outcomes                                                     | Intervention group<br>N = 749 | Comparator<br>group<br>N = 1,452 | Absolute Difference |        |
|--------------------------------------------------------------|-------------------------------|----------------------------------|---------------------|--------|
|                                                              | Mean (95% CI)                 | Mean (95% CI)                    | Mean/pp (95%<br>CI) | p      |
| <b>MMEs<sup>1</sup> per day</b>                              | 37.1 (35.2; 39.0)             | 39.6 (38.2; 40.9)                | 2.5 (0.2; 4.8)      | 0.037  |
| <b>MMEs<sup>1</sup> per day thresholds rates,</b>            |                               |                                  |                     |        |
| $\geq 50$                                                    | 18.7 (15.9; 21.5)             | 22.4 (20.2; 24.5)                | -3.7 (-7.2; -0.2)   | 0.044  |
| $\geq 90$                                                    | 3.2 (1.9; 4.5)                | 6.9 (5.6; 8.2)                   | -3.7 (-1.9; -0.3)   | <0.001 |
| <b>Opioid potency relative to morphine<sup>2</sup> rates</b> |                               |                                  |                     |        |
| Lower potency than morphine                                  | 38.1 (34.8; 41.7)             | 26.4 (24.2; 28.7)                | 11.8 (7.7; 16.0)    | <0.001 |
| Equivalent to morphine                                       | 23.8 (20.9; 26.9)             | 24.2 (22.0; 26.4)                | -0.4 (-4.2; -3.4)   | 0.831  |
| Greater potency than morphine                                | 49.0 (45.4; 52.6)             | 65.4 (62.9; 67.8)                | -16.4 (-20.7; 12.0) | <0.001 |
| <b>DEA schedule classification<sup>3</sup> rates</b>         |                               |                                  |                     |        |
| Schedule IV                                                  | 32.8 (29.6; 36.3)             | 22.2 (20.2; 24.5)                | 10.6 (6.6; 14.6)    | <0.001 |
| Schedule III                                                 | 5.3 (3.9; 7.2)                | 3.2 (2.4; 4.2)                   | 2.2 (-0.3; 4.0)     | 0.021  |
| Schedule II                                                  | 68.8 (65.3; 72.0)             | 82.4 (80.3; 84.2)                | -13.6 (-17.5; -9.8) | <0.001 |

**Abbreviations:** CI, confidence intervals; DEA, Drug Enforcement Administration; MMEs, morphine milligram equivalents.

**Notes:** <sup>1</sup>MMEs were obtained by converting each dispensed opioid prescription using published conversion factors<sup>5-7</sup> based on opioid type, strength, and quantity dispensed (Supplementary Table 17). <sup>2</sup>Drug potency relative to morphine considering published equianalgesic dose conversion factors<sup>5-7</sup> (Supplementary Table 16). <sup>3</sup>Drug schedule categorized according to the U.S. DEA controlled substance schedules<sup>8,9</sup> (Supplementary Table 16).

**Supplementary Table 9.** Comparison of opioid prescribing patterns among opioid users using a broader definition of opioid initiation, using a more stringent definition of opioid initiation ( $\geq 2$  prescriptions or  $\geq 1$  prescription with higher-tablet counts).

| Outcomes                                                     | Intervention group           | Comparator group               | Absolute difference |       |
|--------------------------------------------------------------|------------------------------|--------------------------------|---------------------|-------|
|                                                              | ESS = 415.2<br>Mean (95% CI) | ESS = 1,015.3<br>Mean (95% CI) | Mean/pp (95% CI)    | p     |
| <b>MMEs per day</b>                                          | 43.6 (34.2; 55.6)            | 45.3 (35.7; 57.5)              | 1.7 (-1.6; 5.0)     | 0.377 |
| <b>MMEs per day<sup>1</sup> rates</b>                        |                              |                                |                     |       |
| $\geq 50$                                                    | 29.9 (16.6; 47.8)            | 31.1 (17.8; 48.4)              | 1.1 (-6.3; 8.6)     | 0.791 |
| $\geq 90$                                                    | 0.0 (0.0; 0.5)               | 0.1 (0.0; 0.5)                 | 0.0 (-0.0; 0.1)     | 0.625 |
| <b>Opioid potency relative to morphine<sup>2</sup> rates</b> |                              |                                |                     |       |
| Lower potency than morphine                                  | 33.8 (19.6; 51.7)            | 29.8 (17.1; 46.7)              | -4.0 (-11.0; 3.1)   | 0.341 |
| Equivalent to morphine                                       | 35.0 (19.1; 55.1)            | 34.3 (19.8; 52.5)              | -0.7 (-8.8; 7.5)    | 0.868 |
| Greater potency than morphine                                | 42.3 (27.0; 59.3)            | 49.9 (34.3; 65.4)              | 7.5 (-0.3; 15.3)    | 0.082 |
| <b>DEA Schedule classification<sup>3</sup> rates</b>         |                              |                                |                     |       |
| Schedule IV                                                  | 29.8 (16.4; 47.9)            | 27.4 (15.0; 44.6)              | -2.4 (-9.1; 4.4)    | 0.538 |
| Schedule III                                                 | 0.0 (0.0; 0.0)               | 0.0 (0.0; 0.0)                 | 0.0 (-0.0; 0.0)     | 0.389 |
| Schedule II                                                  | 74.4 (55.8; 86.9)            | 79.2 (62.8; 89.5)              | 4.7 (-1.8; 11.3)    | 0.204 |

**Note:** <sup>1</sup> MMEs were obtained by converting each dispensed opioid prescription using published conversion factors<sup>5-7</sup> based on opioid type, strength, and quantity dispensed (Supplementary Table 23). <sup>2</sup> Drug potency relative to morphine considering published equianalgesic dose conversion factors<sup>5-7</sup> (Supplementary Table 24). <sup>3</sup> Drug schedule categorized according to the U.S. DEA controlled substance schedules<sup>8,9</sup> (Supplementary Table 24).

**Abbreviations:** CI, confidence interval; DEA, Drug Enforcement Administration; MME, morphine milligram equivalent.

**Supplementary Table 10.** Comparison of unweighted (crude) opioid utilization outcomes between intervention and comparator groups, among opioid users, using a more stringent definition of opioid initiation ( $\geq 2$  prescriptions or  $\geq 1$  prescription with higher-tablet counts).

| Outcomes                                                     | Intervention group       | Comparator group         | Absolute Difference |        |
|--------------------------------------------------------------|--------------------------|--------------------------|---------------------|--------|
|                                                              | N = 451<br>Mean (95% CI) | N = 751<br>Mean (95% CI) | Mean/pp (95% CI)    | P      |
| <b>MMEs<sup>1</sup> per day</b>                              | 40.8 (38.7; 42.9)        | 41.5 (39.9; 43.2)        | 0.8 (-1.9; 3.4)     | 0.577  |
| <b>MMEs<sup>1</sup> per day thresholds rates,</b>            |                          |                          |                     |        |
| $\geq 50$                                                    | 22.6 (18.8; 26.5)        | 24.6 (21.6; 27.6)        | 1.9 (-2.9; 6.9)     | 0.432  |
| $\geq 90$                                                    | 4.4 (2.6; 6.3)           | 3.9 (2.6; 5.2)           | -0.1 (-1.8; 1.7)    | 0.640  |
| <b>Opioid potency relative to morphine<sup>2</sup> rates</b> |                          |                          |                     |        |
| Lower potency than morphine                                  | 42.6 (38.1; 47.2)        | 34.8 (31.5; 38.1)        | -7.8 (-13.5; 2.2)   | 0.007  |
| Equivalent to morphine                                       | 22.8 (19.2; 26.9)        | 25.2 (22.3; 28.4)        | 2.4 (-2.5; 7.0)     | 0.342  |
| Greater potency than morphine                                | 52.3 (47.7; 56.9)        | 64.5 (61.1; 67.7)        | 12.2 (6.5; 17.8)    | <0.001 |
| <b>DEA schedule classification<sup>3</sup> rates</b>         |                          |                          |                     |        |
| Schedule IV                                                  | 37.9 (33.6; 42.5)        | 31.1 (28.0; 34.4)        | -6.8 (-12.3; -1.3)  | 0.016  |
| Schedule III                                                 | 4.9 (3.2; 7.3)           | 3.8 (2.6; 5.3)           | -1.1 (-3.5; 1.3)    | 0.360  |
| Schedule II                                                  | 68.7 (64.3; 72.8)        | 79.3 (76.3; 82.0)        | 10.6 (5.4; 15.7)    | <0.001 |

**Abbreviations:** CI, confidence intervals; DEA, Drug Enforcement Administration; MMEs, morphine milligram equivalents.

**Notes:** <sup>1</sup>MMEs were obtained by converting each dispensed opioid prescription using published conversion factors<sup>5-7</sup> based on opioid type, strength, and quantity dispensed (Supplementary Table 23). <sup>2</sup>Drug potency relative to morphine considering published equianalgesic dose conversion factors<sup>5-7</sup> (Supplementary Table 24). <sup>3</sup>Drug schedule categorized according to the U.S. DEA controlled substance schedules<sup>8,9</sup> (Supplementary Table 24).

**Supplementary Table 11.** Subgroup analyses of mean daily MMEs and high-dose thresholds ( $\geq 50$  and  $\geq 90$  MMEs/day) rates among opioid users in the inverse probability weighted sample, adjusted for baseline covariates, using a more stringent definition of opioid initiation ( $\geq 2$  prescriptions or  $\geq 1$  prescription with higher-tablet counts).

| ESS                |       | Mean MMEs/day       |                         |                         |                      | Rates for MMEs/day thresholds |                         |                         |                          |                    |                    |                        |                     |       |
|--------------------|-------|---------------------|-------------------------|-------------------------|----------------------|-------------------------------|-------------------------|-------------------------|--------------------------|--------------------|--------------------|------------------------|---------------------|-------|
|                    |       |                     |                         |                         |                      | $\geq 50$ MMEs/day            |                         |                         |                          | $\geq 90$ MMEs/day |                    |                        |                     |       |
| IG                 | CG    | IG                  | CG                      | Absolute difference     |                      | IG                            | CG                      | Absolute difference     |                          | IG                 | CG                 | Absolute difference    |                     |       |
|                    |       | Mean<br>(95%<br>CI) | Mean<br>(95%<br>CI)     | Diff<br>(95%<br>CI)     | p                    | %<br>(95%<br>CI)              | %<br>(95%<br>CI)        | pp<br>(95%<br>CI)       | p                        | %<br>1(95%<br>CI)  | %<br>(95%<br>CI)   | pp<br>(95%<br>CI)      | p                   |       |
| <b>Sex</b>         |       |                     |                         |                         |                      |                               |                         |                         |                          |                    |                    |                        |                     |       |
| Female             | 156.6 | 300.4               | 41.6<br>(32.5;<br>53.1) | 45.4<br>(35.6;<br>57.8) | 3.8 (-0.2;<br>7.8)   | 0.063                         | 24.8<br>(13.4;<br>41.2) | 31.5<br>(17.7;<br>48.9) | 6.5 (-2.6;<br>15.6)      | 0.164              | 0.1 (0.0;<br>0.6)  | 0.1 (0.0;<br>0.8)      | 0.1 (-0.1;<br>0.2)  | 0.252 |
| Male               | 92.9  | 92.9                | 46.8<br>(36.1;<br>60.6) | 44.9<br>(34.9;<br>57.9) | -1.8 (-<br>7.0; 3.4) | 0.500                         | 37.3<br>(20.2;<br>58.4) | 29.9<br>(16.5;<br>47.9) | -7.4 (-<br>19.5;<br>4.7) | 0.231              | 0.1 (0.0;<br>0.4)  | 0.1 (0.0;<br>0.4)      | -0.1 (-0.2;<br>0.1) | 0.433 |
| <b>Age</b>         |       |                     |                         |                         |                      |                               |                         |                         |                          |                    |                    |                        |                     |       |
| 18-40              | 29.5  | 110.0               | 37.9<br>(29.8;<br>49.7) | 43.4<br>(33.9;<br>55.6) | 5.5 (-0.8;<br>11.8)  | 0.086                         | 24.8<br>(13.4;<br>47.3) | 30.8<br>(15.8;<br>51.2) | 6.0 (-<br>12.5;<br>24.5) | 0.524              | 1.0 (0.1;<br>7.4)  | 3.4 (0.5;<br>18.3)     | 2.2 (-3.0;<br>7.3)  | 0.417 |
| 41-64              | 180.3 | 180.3               | 45.0<br>(35.2;<br>57.6) | 45.4<br>(35.6;<br>57.9) | 0.4 (-6.5;<br>5.7)   | 0.843                         | 34.6<br>(20.4;<br>52.8) | 32.5<br>(19.3;<br>50.2) | -1.7 (-<br>10.8;<br>7.5) | 0.721              | 3.9 (0.7;<br>19.3) | 3.2 (0.7;<br>13.4)     | -0.7 (-4.2;<br>2.7) | 0.675 |
| 65+                | 40.5  | 101.1               | 48.2<br>(37.1;<br>62.6) | 52.8<br>(40.7;<br>68.3) | 4.5 (-2.4;<br>11.3)  | 0.242                         | 34.9<br>(15.5;<br>61.9) | 42.5<br>(24.9;<br>62.1) | 7.5 (-<br>11.9;<br>26.9) | 0.449              | 4.4 (0.8;<br>23.7) | 10.1<br>(2.3;<br>35.5) | 5.7 (-3.9;<br>15.4) | 0.243 |
| <b>U.S. Region</b> |       |                     |                         |                         |                      |                               |                         |                         |                          |                    |                    |                        |                     |       |

| ESS        |       |       | Mean MMEs/day           |                         |                      |       | Rates for MMEs/day thresholds |                         |                           |       |                   |                   |                     |       |
|------------|-------|-------|-------------------------|-------------------------|----------------------|-------|-------------------------------|-------------------------|---------------------------|-------|-------------------|-------------------|---------------------|-------|
|            |       |       |                         |                         |                      |       | ≥50 MMEs/day                  |                         |                           |       | ≥90 MMEs/day      |                   |                     |       |
| Midwest    | 96.8  | 546.2 | 43.1<br>(33.9;<br>54.9) | 43.5<br>(34.7;<br>54.4) | 0.4 (-3.9;<br>4.6)   | 0.871 | 36.9<br>(20.5;<br>56.9)       | 33.1<br>(19.8;<br>50.2) | -3.6 (-<br>14.1;<br>6.9)  | 0.506 | 0.1 (0.0;<br>0.5) | 0.1 (0.0;<br>0.4) | 0.0 (-0.1;<br>0.1)  | 0.573 |
| Northeast  | 124.4 | 16.7  | 41.6<br>(32.5;<br>53.3) | 38.6<br>(29.5;<br>50.4) | -3.0 (-<br>9.6; 3.6) | 0.352 | 21.0<br>(9.9;<br>39.2)        | 10.1<br>(2.6;<br>32.1)  | -10.9 (-<br>26.0;<br>4.2) | 0.155 | 0.0 (0.0;<br>0.4) | 0.1 (0.0;<br>1.0) | 0.1 (-0.1;<br>0.3)  | 0.528 |
| South      | 135.0 | 71.0  | 40.8<br>(31.9;<br>52.3) | 47.9<br>(37.1;<br>61.9) | 7.0 (1.3;<br>13.7)   | 0.035 | 26.2<br>(13.2;<br>45.3)       | 44.4<br>(24.9;<br>65.9) | 18.3<br>(2.2;<br>34.4)    | 0.026 | 0.1 (0.0;<br>0.6) | 0.1 (0.0;<br>0.6) | 0.0 (-0.1;<br>0.1)  | 0.989 |
| West       | 15.6  | 51.0  | 47.7<br>(35.5;<br>63.9) | 52.1<br>(38.2;<br>71.2) | 4.5 (-5.1;<br>18.1)  | 0.517 | 37.7<br>(17.5;<br>63.2)       | 41.1<br>(21.9;<br>63.3) | 3.4 (-<br>19.7;<br>26.5)  | 0.773 | 0.2 (0.0;<br>1.2) | 0.1 (0.0;<br>1.0) | -0.0 (-0.3;<br>0.2) | 0.820 |
| <b>SDI</b> |       |       |                         |                         |                      |       |                               |                         |                           |       |                   |                   |                     |       |
| 0-20       | 83.4  | 221.5 | 42.5<br>(32.9;<br>54.9) | 44.9<br>(35.0;<br>57.4) | 2.4 (-3.8;<br>8.5)   | 0.451 | 31.4<br>(16.8;<br>50.9)       | 28.7<br>(15.6;<br>46.6) | -2.7 (-<br>15.7;<br>10.3) | 0.684 | 0.0 (0.0;<br>0.3) | 0.2 (0.0;<br>0.9) | 0.1 (-0.1;<br>0.4)  | 0.262 |
| 21-40      | 68.0  | 142.2 | 45.6<br>(35.3;<br>58.9) | 49.6<br>(38.5;<br>64.0) | 4.0 (-2.3;<br>10.4)  | 0.210 | 36.2<br>(17.8;<br>59.8)       | 37.7<br>(21.6;<br>50.2) | 1.5 (-<br>14.7;<br>17.7)  | 0.855 | 0.1 (0.0;<br>0.6) | 0.2 (0.0;<br>1.0) | 0.1 (-0.1;<br>0.3)  | 0.318 |
| 41-60      | 63.5  | 98.3  | 45.2<br>(34.7;<br>58.9) | 44.5<br>(34.5;<br>57.4) | -0.7 (-<br>8.2; 6.0) | 0.827 | 33.9<br>(17.6;<br>55.2)       | 29.4<br>(15.5;<br>48.7) | -4.5 (-<br>19.3;<br>10.2) | 0.549 | 0.2 (0.0;<br>1.0) | 0.0 (0.0;<br>0.3) | -0.1 (-0.4;<br>0.1) | 0.353 |
| 61-80      | 27.3  | 82.5  | 43.3<br>(32.9;<br>56.9) | 43.5<br>(33.3;<br>56.9) | 0.2 (-6.7;<br>6.9)   | 0.946 | 20.5<br>(8.5;<br>41.8)        | 29.6<br>(15.5;<br>49.1) | 9.0 (-7.1;<br>25.2)       | 0.273 | 0.1 (0.0;<br>0.8) | 0.1 (0.0;<br>0.7) | -0.0 (-0.2;<br>0.2) | 0.778 |
| 81-100     | 15.5  | 33.8  | 42.5<br>(30.5;<br>59.4) | 44.5<br>(33.9;<br>58.3) | 2.0 (-7.3;<br>13.4)  | 0.744 | 20.1<br>(6.4;<br>48.3)        | 36.8<br>(17.2;<br>62.0) | 16.7 (-<br>8.3;<br>41.7)  | 0.191 | 0.3 (0.0;<br>1.8) | 0.0 (0.0;<br>0.0) | -0.3 (-0.8;<br>0.2) | 0.320 |

| MSK symptomatic anatomical site     | ESS   |       | Mean MMEs/day           |                         |                         |       | Rates for MMEs/day thresholds |                         |                           |         |                   |                   |                     |       |
|-------------------------------------|-------|-------|-------------------------|-------------------------|-------------------------|-------|-------------------------------|-------------------------|---------------------------|---------|-------------------|-------------------|---------------------|-------|
|                                     |       |       |                         |                         |                         |       | ≥50 MMEs/day                  |                         |                           |         | ≥90 MMEs/day      |                   |                     |       |
| Spine                               | 99.1  | 192.2 | 43.3<br>(34.4;<br>54.6) | 41.1<br>(32.8;<br>51.5) | -2.2 (-<br>6.0; 2.5)    | 0.360 | 28.7<br>(14.9;<br>47.9)       | 25.9<br>(13.7;<br>43.5) | -2.7 (-<br>14.9;<br>9.4)  | 0.659   | 0.1 (0.0;<br>0.6) | 0.0 (0.0;<br>0.2) | -0.1 (-0.2;<br>0.1) | 0.408 |
| Lower Limb                          | 135.4 | 270.2 | 48.5<br>(38.1;<br>61.8) | 50.9<br>(40.5;<br>64.2) | 2.5 (-3.1;<br>8.1)      | 0.390 | 42.9<br>(25.0;<br>62.8)       | 39.9<br>(24.0;<br>58.4) | -2.9 (-<br>14.5;<br>8.7)  | 0.621   | 0.2 (0.0;<br>1.2) | 0.3 (0.1;<br>1.3) | 0.1 (-0.1;<br>0.3)  | 0.487 |
| Upper Limb                          | 41.6  | 103.0 | 36.9<br>(28.9;<br>47.1) | 39.8<br>(31.4;<br>50.4) | 2.9 (-3.6;<br>8.4)      | 0.296 | 13.8<br>(5.4;<br>31.0)        | 20.9<br>(9.5;<br>39.9)  | 7.1 (-5.6;<br>19.8)       | 0.270   | 0.0 (0.0;<br>0.3) | 0.1 (0.0;<br>0.4) | 0.1 (-0.1;<br>0.2)  | 0.395 |
| <b>Mental health conditions, %:</b> |       |       |                         |                         |                         |       |                               |                         |                           |         |                   |                   |                     |       |
| No                                  | 253.6 | 495.1 | 43.3<br>(34.5;<br>54.3) | 44.5<br>(35.7;<br>55.5) | 1.4 (-1.4;<br>4.2)      | 0.335 | 29.5<br>(16.9;<br>46.3)       | 30.9<br>(18.1;<br>47.6) | 1.4 (-6.1;<br>9.0)        | 0.708   | 0.1 (0.0;<br>0.4) | 0.1 (0.0;<br>0.4) | 0.0 (-0.0;<br>0.1)  | 0.697 |
| Yes                                 | 5.8   | 95.6  | 38.2<br>(27.6;<br>52.9) | 46.9<br>(35.7;<br>61.7) | 8.7 (-2.1;<br>18.8)     | 0.091 | 34.4<br>(6.6;<br>79.4)        | 30.3<br>(15.3;<br>51.1) | -4.1 (-<br>45.8;<br>37.6) | 0.849   | 0.0 (0.0;<br>0.0) | 0.2 (0.0;<br>0.8) | 0.2 (-0.1;<br>0.4)  | 0.236 |
| <b>Substance use disorders, %:</b>  |       |       |                         |                         |                         |       |                               |                         |                           |         |                   |                   |                     |       |
| No                                  | 247.5 | 557.3 | 37.4<br>(33.8;<br>41.5) | 38.8<br>(35.0;<br>43.1) | 1.4 (-4.2;<br>3.9)      | 0.335 | 15.9<br>(9.6;<br>25.3)        | 16.5<br>(10.3;<br>25.4) | 0.6 (-4.2;<br>5.4)        | 0.809   | 0.1 (0.0;<br>0.2) | 0.1 (0.0;<br>0.2) | 0.0 (-0.0;<br>0.1)  | 0.570 |
| Yes                                 | 5.8   | 10.7  | 18.5<br>(15.9;<br>23.0) | 57.3<br>(37.0;<br>88.8) | 38.8<br>(14.0;<br>63.7) | 0.002 | 0.0 (0.0;<br>0.0)             | 57.6<br>(26.9;<br>83.4) | 57.6<br>(25.7;<br>89.5)   | < 0.001 | 0.0 (0.0;<br>0.0) | 0.2 (0.0;<br>2.7) | 0.2 (-0.3;<br>0.6)  | 0.494 |

**Abbreviations:** CG, comparator group; CI, confidence interval; ESS, effective sample size; IG, intervention group; MME, morphine milligram equivalent; MSK, musculoskeletal; pp, percentage points; SDI, Social Deprivation Index.

**Note:** MMEs were obtained by converting each dispensed opioid prescription using published conversion factors<sup>5-7</sup> based on opioid type, strength, and quantity dispensed (Supplementary Table 23).

**Supplementary Table 12.** Subgroup analyses of opioid potency rates relative to morphine among opioid-receiving patients in the inverse probability weighted sample, adjusted for baseline covariates, using a more stringent definition of opioid initiation ( $\geq 2$  prescriptions or  $\geq 1$  prescription with higher-tablet counts).

| ESS                |       | Opioid potency relative to morphine |                         |                         |                        |                        |                         |                         |                           |                               |                         |                         |                          |       |
|--------------------|-------|-------------------------------------|-------------------------|-------------------------|------------------------|------------------------|-------------------------|-------------------------|---------------------------|-------------------------------|-------------------------|-------------------------|--------------------------|-------|
|                    |       | Lower potency than morphine         |                         |                         |                        | Equivalent to morphine |                         |                         |                           | Greater potency than morphine |                         |                         |                          |       |
| IG                 | CG    | IG                                  | CG                      | Absolute difference     |                        | IG                     | CG                      | Absolute difference     |                           | IG                            | CG                      | Absolute difference     |                          |       |
|                    |       | %<br>(95%<br>CI)                    | %<br>(95%<br>CI)        | pp<br>(95%<br>CI)       | p                      | %<br>(95%<br>CI)       | %<br>(95%<br>CI)        | pp<br>(95%<br>CI)       | p                         | %<br>(95%<br>CI)              | %<br>(95%<br>CI)        | pp<br>(95%<br>CI)       | p                        |       |
| <b>Sex</b>         |       |                                     |                         |                         |                        |                        |                         |                         |                           |                               |                         |                         |                          |       |
| Female             | 156.6 | 300.4                               | 36.8<br>(21.5;<br>55.3) | 27.9<br>(15.7;<br>44.7) | -8.9 (-<br>18.0; 0.3)  | 0.057                  | 30.7<br>(16.2;<br>50.4) | 33.6<br>(19.2;<br>51.9) | 2.9 (-6.7;<br>12.5)       | 0.555                         | 41.3<br>(25.7;<br>59.0) | 53.2<br>(36.8;<br>68.9) | 11.8<br>(1.9;<br>21.8)   | 0.020 |
| Male               | 92.9  | 267.3                               | 28.7<br>(15.3;<br>47.2) | 32.7<br>(18.7;<br>50.7) | 4.0 (-5.7;<br>13.7)    | 0.419                  | 40.9<br>(22.0;<br>63.0) | 34.6<br>(19.6;<br>53.4) | -6.4 (-<br>19.1;<br>6.4)  | 0.328                         | 45.2<br>(28.2;<br>63.5) | 45.8<br>(29.9;<br>62.6) | 0.6 (-<br>10.6;<br>11.7) | 0.921 |
| <b>Age</b>         |       |                                     |                         |                         |                        |                        |                         |                         |                           |                               |                         |                         |                          |       |
| 18-40              | 29.5  | 110                                 | 34.6<br>(17.3;<br>57.1) | 24.7<br>(12.8;<br>42.4) | -9.8 (-<br>26.4; 6.8)  | 0.247                  | 28.4<br>(11.2;<br>55.3) | 39.4<br>(22.2;<br>59.6) | 11.0 (-<br>10.1;<br>32.1) | 0.306                         | 38.7<br>(19.5;<br>62.2) | 52.1<br>(34.5;<br>69.2) | 13.4 (-<br>7.6;<br>34.4) | 0.210 |
| 41-64              | 180.3 | 362.3                               | 41.9<br>(25.8;<br>60.0) | 37.9<br>(22.9;<br>55.6) | -4.0 (-<br>13.1; 5.1)  | 0.387                  | 33.2<br>(18.3;<br>52.4) | 32.7<br>(18.9;<br>50.3) | -0.5 (-<br>9.4; 8.4)      | 0.909                         | 42.9<br>(28.2;<br>59.0) | 46.3<br>(31.6;<br>61.7) | 3.4 (-5.7;<br>12.4)      | 0.468 |
| 65+                | 40.5  | 101.1                               | 37.1<br>(19.3;<br>59.2) | 34.4<br>(19.2;<br>53.5) | -2.7 (-<br>19.1; 13.6) | 0.743                  | 37.3<br>(17.9;<br>61.7) | 28.8<br>(15.2;<br>47.8) | -8.4 (-<br>27.1;<br>10.2) | 0.376                         | 39.3<br>(22.5;<br>59.1) | 58.5<br>(40.7;<br>74.4) | 19.2<br>(2.5;<br>35.9)   | 0.024 |
| <b>U.S. Region</b> |       |                                     |                         |                         |                        |                        |                         |                         |                           |                               |                         |                         |                          |       |

| ESS        |       | Opioid potency relative to morphine |                   |                     |                     |                        |                   |                     |                    |                               |                   |                     |                    |             |
|------------|-------|-------------------------------------|-------------------|---------------------|---------------------|------------------------|-------------------|---------------------|--------------------|-------------------------------|-------------------|---------------------|--------------------|-------------|
|            |       | Lower potency than morphine         |                   |                     |                     | Equivalent to morphine |                   |                     |                    | Greater potency than morphine |                   |                     |                    |             |
| IG         | CG    | IG                                  | CG                | Absolute difference |                     | IG                     | CG                | Absolute difference |                    | IG                            | CG                | Absolute difference |                    |             |
|            |       |                                     |                   | % (95% CI)          | % (95% CI)          |                        |                   | pp (95% CI)         | p                  |                               |                   | % (95% CI)          | % (95% CI)         | pp (95% CI) |
| Midwest    | 96.8  | 546.2                               | 29.8 (16.5; 47.8) | 28.5 (16.9; 44.0)   | -1.3 (-10.3; 7.8)   | 0.781                  | 33.3 (17.1; 54.8) | 34.1 (19.9; 52.0)   | 0.8 (-9.7; 11.4)   | 0.878                         | 54.2 (36.5; 71.0) | 55.9 (40.7; 70.1)   | 1.7 (-9.1; 12.5)   | 0.762       |
| Northeast  | 124.4 | 16.7                                | 31.7 (17.3; 50.8) | 26.8 (9.9; 54.9)    | -5.0 (-26.7; 16.7)  | 0.653                  | 25.7 (12.2; 46.2) | 22.2 (7.6; 50.0)    | -3.4 (-23.6; 16.7) | 0.740                         | 49.0 (31.3; 67.0) | 61.8 (34.0; 83.5)   | 12.7 (-12.4; 37.8) | 0.320       |
| South      | 135   | 71                                  | 48.6 (30.3; 67.3) | 32.5 (17.4; 52.4)   | -16.1 (-30.2; -1.9) | 0.026                  | 35.8 (19.1; 56.7) | 26.2 (12.6; 46.8)   | -9.5 (-23.9; 4.8)  | 0.194                         | 26.0 (14.5; 42.1) | 48.3 (30.3; 66.8)   | 22.3 (8.2; 36.4)   | 0.002       |
| West       | 15.6  | 51                                  | 22.9 (8.5; 48.5)  | 30.2 (15.4; 50.8)   | 7.3 (-13.1; 27.8)   | 0.481                  | 44.4 (16.9; 75.8) | 55.5 (33.0; 76.0)   | 11.1 (-20.1; 42.3) | 0.486                         | 43.5 (20.4; 69.8) | 40.5 (23.5; 60.2)   | -3.0 (-28.0; 22.0) | 0.815       |
| <b>SDI</b> |       |                                     |                   |                     |                     |                        |                   |                     |                    |                               |                   |                     |                    |             |
| 0-20       | 83.4  | 221.5                               | 29.3 (15.5; 48.3) | 27.2 (14.8; 44.6)   | -2.0 (-12.4; 8.4)   | 0.703                  | 38.3 (19.1; 61.9) | 33.0 (18.0; 52.5)   | -5.3 (-19.7; 9.2)  | 0.477                         | 54.9 (35.2; 73.2) | 52.2 (34.8; 69.1)   | -2.8 (-15.5; 10.0) | 0.672       |
| 21-40      | 68    | 142.2                               | 21.3 (10.0; 39.7) | 25.9 (13.9; 43.2)   | 4.6 (-6.3; 15.6)    | 0.408                  | 36.2 (18.4; 58.8) | 32.0 (17.0; 52.0)   | -4.2 (-18.6; 10.2) | 0.568                         | 44.7 (26.3; 64.6) | 56.3 (38.3; 72.7)   | 11.6 (-2.7; 25.9)  | 0.113       |
| 41-60      | 63.5  | 98.3                                | 51.4 (31.0; 71.3) | 28.8 (14.8; 48.4)   | -22.6 (-37.8; -7.3) | 0.004                  | 30.8 (14.4; 54.1) | 35.7 (19.2; 56.5)   | 4.9 (-10.1; 19.9)  | 0.523                         | 26.1 (12.9; 45.6) | 55.5 (36.5; 73.0)   | 29.4 (14.1; 44.6)  | 0.000       |
| 61-80      | 27.3  | 82.5                                | 32.2 (15.4; 55.4) | 30.4 (16.1; 50.0)   | -1.7 (-20.0; 16.5)  | 0.851                  | 28.6 (12.3; 53.3) | 37.8 (20.0; 59.6)   | 9.3 (-8.9; 27.4)   | 0.317                         | 53.7 (32.4; 73.7) | 48.7 (30.2; 67.6)   | -5.0 (-23.7; 13.7) | 0.600       |

| ESS                                    |       |       | Opioid potency relative to morphine |                         |                         |       |                         |                         |                            |       |                               |                         |                           |       |
|----------------------------------------|-------|-------|-------------------------------------|-------------------------|-------------------------|-------|-------------------------|-------------------------|----------------------------|-------|-------------------------------|-------------------------|---------------------------|-------|
|                                        |       |       | Lower potency than morphine         |                         |                         |       | Equivalent to morphine  |                         |                            |       | Greater potency than morphine |                         |                           |       |
| IG                                     | CG    |       | IG                                  | CG                      | Absolute difference     |       | IG                      | CG                      | Absolute difference        |       | IG                            | CG                      | Absolute difference       |       |
|                                        |       |       | %<br>(95%<br>CI)                    | %<br>(95%<br>CI)        | pp (95%<br>CI)          | p     | %<br>(95%<br>CI)        | %<br>(95%<br>CI)        | pp (95%<br>CI)             | p     | %<br>(95%<br>CI)              | %<br>(95%<br>CI)        | pp (95%<br>CI)            | p     |
| 81-100                                 | 15.5  | 33.8  | 36.3<br>(15.0;<br>64.8)             | 41.7<br>(21.3;<br>65.4) | 5.4 (-22.2;<br>33.0)    | 0.701 | 37.9<br>(14.6;<br>68.7) | 36.1<br>(16.8;<br>61.2) | -1.8 (-<br>31.8;<br>28.1)  | 0.904 | 32.6<br>(14.0;<br>59.1)       | 31.0<br>(14.9;<br>53.6) | -1.6 (-<br>26.1;<br>22.9) | 0.897 |
| <b>MSK symptomatic anatomical site</b> |       |       |                                     |                         |                         |       |                         |                         |                            |       |                               |                         |                           |       |
| Spine                                  | 99.1  | 192.2 | 31.1<br>(17.5;<br>48.9)             | 35.0<br>(20.6;<br>52.8) | 4.0 (-6.6;<br>14.5)     | 0.464 | 39.7<br>(21.5;<br>61.4) | 36.0<br>(20.2;<br>55.6) | -3.7 (-<br>16.6;<br>9.2)   | 0.572 | 44.7<br>(28.0;<br>62.6)       | 43.6<br>(27.9;<br>60.7) | 18.6<br>(7.9;<br>29.3)    | 0.853 |
| Lower Limb                             | 135.4 | 270.2 | 43.7<br>(26.4;<br>62.7)             | 30.1<br>(17.3;<br>47.0) | -13.6 (-<br>24.5; -2.7) | 0.015 | 30.4<br>(15.7;<br>50.8) | 32.7<br>(18.3;<br>51.2) | 2.3 (-8.3;<br>12.8)        | 0.677 | 35.0<br>(20.4;<br>53.1)       | 53.6<br>(37.3;<br>69.2) | -1.1 (-<br>12.3;<br>10.2) | 0.001 |
| Upper Limb                             | 41.6  | 103   | 27.0<br>(13.1;<br>47.6)             | 21.3<br>(10.5;<br>38.3) | -5.8 (-<br>20.3; 8.7)   | 0.433 | 30.9<br>(13.7;<br>55.7) | 29.8<br>(15.3;<br>49.8) | -1.1 (-<br>17.7;<br>15.5)  | 0.896 | 48.5<br>(28.5;<br>69.0)       | 52.7<br>(34.3;<br>70.4) | 4.2 (-<br>13.9;<br>22.3)  | 0.650 |
| <b>Mental health conditions, %:</b>    |       |       |                                     |                         |                         |       |                         |                         |                            |       |                               |                         |                           |       |
| No                                     | 253.6 | 495.1 | 38.5<br>(23.4;<br>56.2)             | 33.3<br>(19.9;<br>50.0) | -5.2 (-<br>12.8; 2.4)   | 0.176 | 30.5<br>(16.3;<br>49.7) | 30.9<br>(17.4;<br>48.7) | 0.4 (-7.1;<br>7.9)         | 0.909 | 41.4<br>(26.5;<br>58.0)       | 49.6<br>(34.4;<br>64.8) | 8.2 (0.3;<br>16.1)        | 0.041 |
| Yes                                    | 5.8   | 95.6  | 18.4<br>(3.5;<br>58.5)              | 29.1<br>(15.1;<br>48.6) | 10.7 (-<br>16.4; 37.9)  | 0.439 | 50.7<br>(15.1;<br>85.7) | 35.9<br>(19.4;<br>56.6) | -14.8 (-<br>56.2;<br>26.6) | 0.483 | 52.6<br>(16.4;<br>86.2)       | 48.3<br>(30.3;<br>66.7) | -4.3 (-<br>45.5;<br>37.0) | 0.840 |
| <b>Substance use disorders, %:</b>     |       |       |                                     |                         |                         |       |                         |                         |                            |       |                               |                         |                           |       |

| ESS |       |       | Opioid potency relative to morphine |                         |                       |       |                            |                         |                               |       |                               |                         |                         |       |
|-----|-------|-------|-------------------------------------|-------------------------|-----------------------|-------|----------------------------|-------------------------|-------------------------------|-------|-------------------------------|-------------------------|-------------------------|-------|
|     |       |       | Lower potency than morphine         |                         |                       |       | Equivalent to morphine     |                         |                               |       | Greater potency than morphine |                         |                         |       |
| IG  | CG    |       | IG                                  | CG                      | Absolute difference   |       | IG                         | CG                      | Absolute difference           |       | IG                            | CG                      | Absolute difference     |       |
|     |       |       | %<br>(95%<br>CI)                    | %<br>(95%<br>CI)        | pp (95%<br>CI)        | p     | %<br>(95%<br>CI)           | %<br>(95%<br>CI)        | pp<br>(95%<br>CI)             | p     | %<br>(95%<br>CI)              | %<br>(95%<br>CI)        | pp<br>(95%<br>CI)       | p     |
| No  | 247.5 | 557.3 | 31.0<br>(21.7;<br>42.2)             | 27.1<br>(19.0;<br>37.1) | -3.9 (-<br>10.6; 2.7) | 0.248 | 27.4<br>(17.6;<br>39.9)    | 27.0<br>(19.0;<br>36.9) | -0.4 (-<br>7.5; 6.8)          | 0.921 | 54.6<br>(42.4;<br>66.3)       | 61.8<br>(51.0;<br>71.6) | 7.2 (-0.6;<br>15.0)     | 0.070 |
| Yes | 1     | 10.7  | 0.0 (0.0;<br>0.0)                   | 39.2<br>(15.5;<br>69.3) | 39.2 (9.2;<br>69.1)   | 0.010 | 100.0<br>(100.0;<br>100.0) | 33.9<br>(10.0;<br>70.4) | -66.1 (-<br>100.4; -<br>31.8) | 0.000 | 0.0 (0.0;<br>0.0)             | 42.5<br>(18.9;<br>70.2) | 42.5<br>(14.2;<br>70.8) | 0.003 |

**Abbreviations:** CG, comparator group; CI, confidence interval; ESS, effective sample size; IG, intervention group; MSK, musculoskeletal; pp, percentage points; SDI, Social Deprivation Index.

**Note:** Drug potency relative to morphine considering published equianalgesic dose conversion factors<sup>5-7</sup> (Supplementary Table 24).

**Supplementary Table 13.** Subgroup analyses of opioid prescribing rates by Drug Enforcement Administration (DEA) schedule classification among opioid-receiving patients in the inverse probability weighted sample, adjusted for baseline covariates, using a more stringent definition of opioid initiation ( $\geq 2$  prescriptions or  $\geq 1$  prescription with higher-tablet counts).

| ESS                |       |       | DEA schedule classification |                   |                     |       |                |                |                     |       |                   |                   |                     |       |
|--------------------|-------|-------|-----------------------------|-------------------|---------------------|-------|----------------|----------------|---------------------|-------|-------------------|-------------------|---------------------|-------|
|                    |       |       | Schedule IV                 |                   |                     |       | Schedule III   |                |                     |       | Schedule II       |                   |                     |       |
| IG                 | CG    |       | IG                          | CG                | Absolute difference |       | IG             | CG             | Absolute difference |       | IG                | CG                | Absolute difference |       |
|                    |       |       | % (95% CI)                  | % (95% CI)        | pp (95% CI)         | p     | % (95% CI)     | % (95% CI)     | pp (95% CI)         | p     | % (95% CI)        | % (95% CI)        | pp (95% CI)         | p     |
| <b>Sex</b>         |       |       |                             |                   |                     |       |                |                |                     |       |                   |                   |                     |       |
| Female             | 156.6 | 300.4 | 32.9 (18.3; 51.9)           | 26.1 (14.0; 43.2) | -6.8 (-15.7; 2.0)   | 0.131 | 0.0 (0.0; 0.0) | 0.0 (0.0; 0.0) | 0.0 (0.0; 0.0)      | 0.430 | 72.4 (52.9; 85.9) | 81.7 (65.8; 91.2) | 9.3 (0.5; 18.1)     | 0.038 |
| Male               | 92.9  | 267.3 | 24.8 (12.6; 43.1)           | 29.6 (16.1; 48.0) | 4.8 (-4.5; 14.1)    | 0.310 | 0.0 (0.0; 0.0) | 0.0 (0.0; 0.0) | 0.0 (0.0; 0.0)      | 0.497 | 78.5 (59.9; 89.9) | 75.7 (57.2; 87.9) | -2.7 (-11.5; 6.0)   | 0.540 |
| <b>Age</b>         |       |       |                             |                   |                     |       |                |                |                     |       |                   |                   |                     |       |
| 18-40              | 29.5  | 110   | 32.0 (15.4; 54.9)           | 20.1 (9.8; 36.9)  | -11.8 (-28.0; 4.3)  | 0.150 | 0.0 (0.0; 0.0) | 0.0 (0.0; 0.0) | 0.0 (0.0; 0.0)      | 0.626 | 68.7 (44.9; 85.6) | 87.2 (72.9; 94.5) | 18.4 (1.5; 35.3)    | 0.033 |
| 41-64              | 180.3 | 362.3 | 35.3 (20.3; 53.9)           | 34.1 (19.6; 52.4) | -1.2 (-10.0; 7.6)   | 0.787 | 0.0 (0.0; 0.0) | 0.0 (0.0; 0.0) | 0.0 (0.0; 0.0)      | 0.266 | 68.0 (48.5; 82.7) | 71.0 (52.3; 84.6) | 3.1 (-5.6; 11.7)    | 0.489 |
| 65+                | 40.5  | 101.1 | 35.5 (18.1; 57.9)           | 33.1 (17.9; 52.7) | -2.4 (-18.4; 13.6)  | 0.766 | 0.0 (0.0; 0.0) | 0.0 (0.0; 0.0) | 0.0 (0.0; 0.0)      | 0.754 | 70.7 (47.7; 86.5) | 76.7 (57.4; 89.0) | 6.1 (-9.7; 21.8)    | 0.451 |
| <b>U.S. Region</b> |       |       |                             |                   |                     |       |                |                |                     |       |                   |                   |                     |       |

| ESS        |       |       | DEA schedule classification |                         |                           |       |                   |                   |                   |       |                         |                         |                           |       |
|------------|-------|-------|-----------------------------|-------------------------|---------------------------|-------|-------------------|-------------------|-------------------|-------|-------------------------|-------------------------|---------------------------|-------|
|            |       |       | Schedule IV                 |                         |                           |       | Schedule III      |                   |                   |       | Schedule II             |                         |                           |       |
| Midwest    | 96.8  | 546.2 | 26.8<br>(14.1;<br>44.8)     | 28.0<br>(16.1;<br>44.1) | 1.2 (-7.6;<br>10.1)       | 0.785 | 0.0 (0.0;<br>0.0) | 0.0 (0.0;<br>0.0) | 0.0 (0.0;<br>0.0) | 0.393 | 80.9<br>(64.4;<br>90.8) | 82.0<br>(67.9;<br>90.7) | 1.1 (-6.5;<br>8.7)        | 0.778 |
| Northeast  | 124.4 | 16.7  | 30.7<br>(16.2;<br>50.3)     | 23.2 (7.6;<br>52.4)     | -7.5 (-<br>29.3;<br>14.3) | 0.500 | 0.0 (0.0;<br>0.0) | 0.0 (0.0;<br>0.0) | 0.0 (0.0;<br>0.0) | 0.554 | 75.8<br>(56.2;<br>88.5) | 84.2<br>(56.3;<br>95.6) | 8.4 (-<br>10.2;<br>26.9)  | 0.377 |
| South      | 135   | 71    | 40.0<br>(22.9;<br>59.9)     | 27.9<br>(14.1;<br>47.9) | -12.0 (-<br>25.8; 1.7)    | 0.086 | 0.0 (0.0;<br>0.0) | 0.0 (0.0;<br>0.0) | 0.0 (0.0;<br>0.0) | 0.230 | 58.0<br>(36.8;<br>76.6) | 74.0<br>(53.6;<br>87.6) | 16.0 (1.9;<br>30.1)       | 0.026 |
| West       | 15.6  | 51    | 22.2 (8.3;<br>47.4)         | 25.5<br>(12.2;<br>45.9) | 3.3 (-<br>16.0;<br>22.6)  | 0.734 | 0.0 (0.0;<br>0.0) | 0.0 (0.0;<br>0.0) | 0.0 (0.0;<br>0.0) | 0.348 | 82.8<br>(59.5;<br>94.1) | 78.7<br>(58.8;<br>90.6) | -4.1 (-<br>20.7;<br>12.5) | 0.630 |
| <b>SDI</b> |       |       |                             |                         |                           |       |                   |                   |                   |       |                         |                         |                           |       |
| 0-20       | 83.4  | 221.5 | 26.1<br>(13.1;<br>45.1)     | 23.4<br>(12.1;<br>40.4) | -2.7 (-<br>12.6; 7.3)     | 0.597 | 0.0 (0.0;<br>0.0) | 0.0 (0.0;<br>0.0) | 0.0 (0.0;<br>0.0) | 0.842 | 78.3<br>(59.5;<br>89.9) | 79.9<br>(63.1;<br>90.3) | 1.6 (-7.7;<br>10.9)       | 0.735 |
| 21-40      | 68    | 142.2 | 19.3 (8.5;<br>38.0)         | 23.7<br>(12.2;<br>41.1) | 4.4 (-6.1;<br>15.0)       | 0.410 | 0.0 (0.0;<br>0.0) | 0.0 (0.0;<br>0.0) | 0.0 (0.0;<br>0.0) | 0.884 | 81.3<br>(62.1;<br>92.0) | 82.5<br>(66.5;<br>91.8) | 1.2 (-9.3;<br>11.7)       | 0.820 |
| 41-60      | 63.5  | 98.3  | 39.3<br>(21.2;<br>61.0)     | 27.8<br>(13.8;<br>48.1) | -11.5 (-<br>26.4; 3.4)    | 0.130 | 0.0 (0.0;<br>0.0) | 0.0 (0.0;<br>0.0) | 0.0 (0.0;<br>0.0) | 0.134 | 58.8<br>(36.2;<br>78.3) | 82.0<br>(63.9;<br>92.1) | 23.1 (6.4;<br>39.9)       | 0.007 |
| 61-80      | 27.3  | 82.5  | 31.3<br>(14.4;<br>55.1)     | 27.5<br>(13.8;<br>47.3) | -3.8 (-<br>21.7;<br>14.2) | 0.681 | 0.0 (0.0;<br>0.0) | 0.0 (0.0;<br>0.0) | 0.0 (0.0;<br>0.0) | 0.314 | 82.3<br>(62.9;<br>92.7) | 77.1<br>(57.6;<br>89.3) | -5.2 (-<br>18.5; 8.1)     | 0.444 |
| 81-100     | 15.5  | 33.8  | 31.9<br>(12.8;<br>59.9)     | 38.2<br>(18.4;<br>62.8) | 6.3 (-<br>19.0;<br>31.5)  | 0.626 | 0.0 (0.0;<br>0.0) | 0.0 (0.0;<br>0.0) | 0.0 (0.0;<br>0.0) | 0.778 | 69.2<br>(42.8;<br>87.0) | 67.1<br>(41.7;<br>85.4) | -2.0 (-<br>24.6;<br>20.5) | 0.860 |

| ESS                                    |       |       |  | DEA schedule classification |                         |                             |       |                   |                   |                      |       |                            |                         |                           |       |  |  |  |  |  |  |
|----------------------------------------|-------|-------|--|-----------------------------|-------------------------|-----------------------------|-------|-------------------|-------------------|----------------------|-------|----------------------------|-------------------------|---------------------------|-------|--|--|--|--|--|--|
|                                        |       |       |  | Schedule IV                 |                         |                             |       | Schedule III      |                   |                      |       | Schedule II                |                         |                           |       |  |  |  |  |  |  |
| <b>MSK symptomatic anatomical site</b> |       |       |  |                             |                         |                             |       |                   |                   |                      |       |                            |                         |                           |       |  |  |  |  |  |  |
| Spine                                  | 99.1  | 192.2 |  | 28.3<br>(15.4;<br>46.1)     | 32.2<br>(18.2;<br>50.4) | -13.2 (-<br>24.1; -<br>2.3) | 0.459 | 0.0 (0.0;<br>0.0) | 0.0 (0.0;<br>0.0) | 0.0 (0.0;<br>0.0)    | 0.483 | 76.3<br>(57.4;<br>88.5)    | 74.5<br>(55.8;<br>87.2) | 12.7 (1.5;<br>24.0)       | 0.702 |  |  |  |  |  |  |
| Lower Limb                             | 135.4 | 270.2 |  | 40.8<br>(23.6;<br>60.7)     | 27.6<br>(15.2;<br>44.8) | 3.9 (-6.5;<br>14.4)         | 0.018 | 0.0 (0.0;<br>0.0) | 0.0 (0.0;<br>0.0) | 0.0 (0.0;<br>0.0)    | 0.564 | 68.5<br>(47.1;<br>84.2)    | 81.2<br>(65.4;<br>90.8) | -1.8 (-<br>10.8; 7.3)     | 0.027 |  |  |  |  |  |  |
| Upper Limb                             | 41.6  | 103   |  | 18.7 (8.0;<br>37.7)         | 17.6 (8.1;<br>34.1)     | -1.1 (-<br>13.7;<br>11.6)   | 0.871 | 0.0 (0.0;<br>0.0) | 0.0 (0.0;<br>0.0) | 0.0 (0.0;<br>0.0)    | 0.153 | 78.2<br>(57.4;<br>90.5)    | 81.7<br>(62.9;<br>92.2) | 3.5 (-<br>10.3;<br>17.4)  | 0.615 |  |  |  |  |  |  |
| <b>Mental health conditions, %:</b>    |       |       |  |                             |                         |                             |       |                   |                   |                      |       |                            |                         |                           |       |  |  |  |  |  |  |
| No                                     | 253.6 | 495.1 |  | 34.0<br>(19.7;<br>51.9)     | 31.1<br>(18.0;<br>48.1) | -2.9 (-<br>10.3; 4.4)       | 0.436 | 0.0 (0.0;<br>0.0) | 0.0 (0.0;<br>0.0) | 0.0 (0.0;<br>0.0)    | 0.213 | 74.9<br>(57.5;<br>86.8)    | 79.9<br>(64.8;<br>89.5) | 5.0 (-1.7;<br>11.6)       | 0.142 |  |  |  |  |  |  |
| Yes                                    | 5.8   | 95.6  |  | 21.5 (4.1;<br>63.9)         | 25.0<br>(12.1;<br>44.6) | 3.5 (-<br>26.6;<br>33.6)    | 0.821 | 0.0 (0.0;<br>0.0) | 0.0 (0.0;<br>0.0) | 0.0 (0.0;<br>0.0)    | 0.181 | 77.8<br>(35.3;<br>95.8)    | 77.6<br>(57.0;<br>90.1) | -0.2 (-<br>30.4;<br>30.0) | 0.990 |  |  |  |  |  |  |
| <b>Substance use disorders, %:</b>     |       |       |  |                             |                         |                             |       |                   |                   |                      |       |                            |                         |                           |       |  |  |  |  |  |  |
| No                                     | 247.5 | 557.3 |  | 25.9<br>(17.5;<br>36.6)     | 23.6<br>(16.0;<br>33.4) | -2.3 (-8.5;<br>3.8)         | 0.458 | 0.1 (0.0;<br>0.2) | 0.1 (0.0;<br>0.2) | -0.0 (-<br>0.1; 0.0) | 0.315 | 76.8<br>(66.2;<br>84.8)    | 81.3<br>(72.3;<br>87.9) | 4.5 (-1.4;<br>10.4)       | 0.134 |  |  |  |  |  |  |
| Yes                                    | 1.0   | 10.7  |  | 0.0 (0.0;<br>0.0)           | 38.0<br>(14.1;<br>69.6) | 38.0 (7.0;<br>69.0)         | 0.016 | 0.0 (0.0;<br>0.0) | 0.0 (0.0;<br>0.0) | 0.0 (-0.0;<br>0.0)   | 0.792 | 100.0<br>(100.0;<br>100.0) | 72.6<br>(39.6;<br>91.4) | -27.4 (-<br>55.2; 0.3)    | 0.053 |  |  |  |  |  |  |

**Abbreviations:** CG, comparator group; CI, confidence interval; DEA, Drug Enforcement Administration; ESS, effective sample size; IG, intervention group; MSK, musculoskeletal; pp, percentage points; SDI, Social Deprivation Index.

**Note:** Drug schedule categorized according to U.S. Drug Enforcement Administration (DEA) controlled substance schedules<sup>8,9</sup> (Supplementary Table 24).

**Supplementary Table 14.** Comparison of unweighted (crude) engagement.

| <b>Engagement</b>                                                      | <b>Intervention group</b><br>N = 15,405 | <b>Comparator group</b><br>N = 15,495 |
|------------------------------------------------------------------------|-----------------------------------------|---------------------------------------|
| <b>Sessions, Median (IQR)</b>                                          | 13 (9; 23)                              | 6 (3; 11)                             |
| <b>Proportion of patients with <math>\leq 3</math> sessions, N (%)</b> | 983 (6.4)                               | 4,993 (32.2)                          |

**Abbreviations:** Interquartile range.

**Supplementary Table 15.** Baseline characteristics of the intervention group (AI Care Program) and the comparator group (in-person physical therapy) in the matched population.

|                                                | <b>Intervention Group</b><br>(N=4,244) | <b>Comparator Group</b><br>(N=4,244) | <b>P</b> |
|------------------------------------------------|----------------------------------------|--------------------------------------|----------|
| <b>Demographic characteristics</b>             |                                        |                                      |          |
| <b>Sex, N (%):</b>                             |                                        |                                      | 1.00     |
| Female                                         | 2,431 (57.3)                           | 2,431 (57.3)                         |          |
| Male                                           | 1,813 (42.7)                           | 1,813 (42.7)                         |          |
| <b>Age categories (years), N (%):</b>          |                                        |                                      | 1.00     |
| 18-40                                          | 1,026 (24.2)                           | 1,026 (24.2)                         |          |
| 41-64                                          | 2,854 (67.2)                           | 2,854 (67.2)                         |          |
| +65                                            | 364 (8.6)                              | 364 (8.6)                            |          |
| <b>Geographic U.S. Region, N (%):</b>          |                                        |                                      | 1.00     |
| Midwest                                        | 3,283 (77.4)                           | 3,283 (77.4)                         |          |
| Northeast                                      | 94 (2.2)                               | 94 (2.2)                             |          |
| South                                          | 631 (14.9)                             | 631 (14.9)                           |          |
| West                                           | 236 (5.6)                              | 236 (5.6)                            |          |
| <b>Social Deprivation Index, N (%):</b>        |                                        |                                      | 1.00     |
| 0-20                                           | 1,673 (39.4)                           | 1,673 (39.4)                         |          |
| 21-40                                          | 1,162 (27.4)                           | 1,162 (27.4)                         |          |
| 41-60                                          | 687 (16.2)                             | 687 (16.2)                           |          |
| 61-80                                          | 454 (10.7)                             | 454 (10.7)                           |          |
| 81-100                                         | 268 (6.3)                              | 268 (6.3)                            |          |
| <b>Clinical data</b>                           |                                        |                                      |          |
| <b>MSK symptomatic anatomical site, N (%):</b> |                                        |                                      | 1.00     |
| Spine                                          | 1,829 (43.1)                           | 1,829 (43.1)                         |          |
| Lower Limb                                     | 1,509 (35.6)                           | 1,509 (35.6)                         |          |
| Upper Limb                                     | 906 (21.3)                             | 906 (21.3)                           |          |
| <b>Concurrent MSK conditions, N (%):</b>       |                                        |                                      | 1.00     |
| 0                                              | 3397 (80.0)                            | 3397 (80.0)                          |          |
| 1+                                             | 847 (20.0)                             | 847 (20.0)                           |          |

|                                                | <b>Intervention Group<br/>(N=4,244)</b> | <b>Comparator Group<br/>(N=4,244)</b> | <b>P</b> |
|------------------------------------------------|-----------------------------------------|---------------------------------------|----------|
| <b>Mental health conditions, N (%):</b>        |                                         |                                       | 0.266    |
| No                                             | 3984 (93.9)                             | 4009 (94.5)                           |          |
| Yes                                            | 260 (6.1)                               | 235 (5.5)                             |          |
| <b>Substance use disorders, N (%):</b>         |                                         |                                       | 0.478    |
| No                                             | 4216 (99.3)                             | 4222 (99.5)                           |          |
| Yes                                            | 28 (0.7)                                | 22 (0.5)                              |          |
| <b>Elixhauser Comorbidity Index, mean (SD)</b> | -0.3 (2.2)                              | -0.2 (2.1)                            | 0.099    |
| <b>Elixhauser Comorbidity Index, N (%):</b>    |                                         |                                       | 0.331    |
| <0                                             | 581 (13.7)                              | 590 (13.9)                            |          |
| 0                                              | 3,475 (81.9)                            | 3,445 (81.2)                          |          |
| 1-4                                            | 101 (2.4)                               | 97 (2.3)                              |          |
| ≥5                                             | 87 (2.0)                                | 112 (2.6)                             |          |
| <b>TCOC, mean (SD) (\$)</b>                    | 1,108.3 (1,729.4)                       | 1,168.6 (1,705.4)                     | 0.106    |

**Abbreviations:** MSK, musculoskeletal; TCOC, total all-cause costs of care.

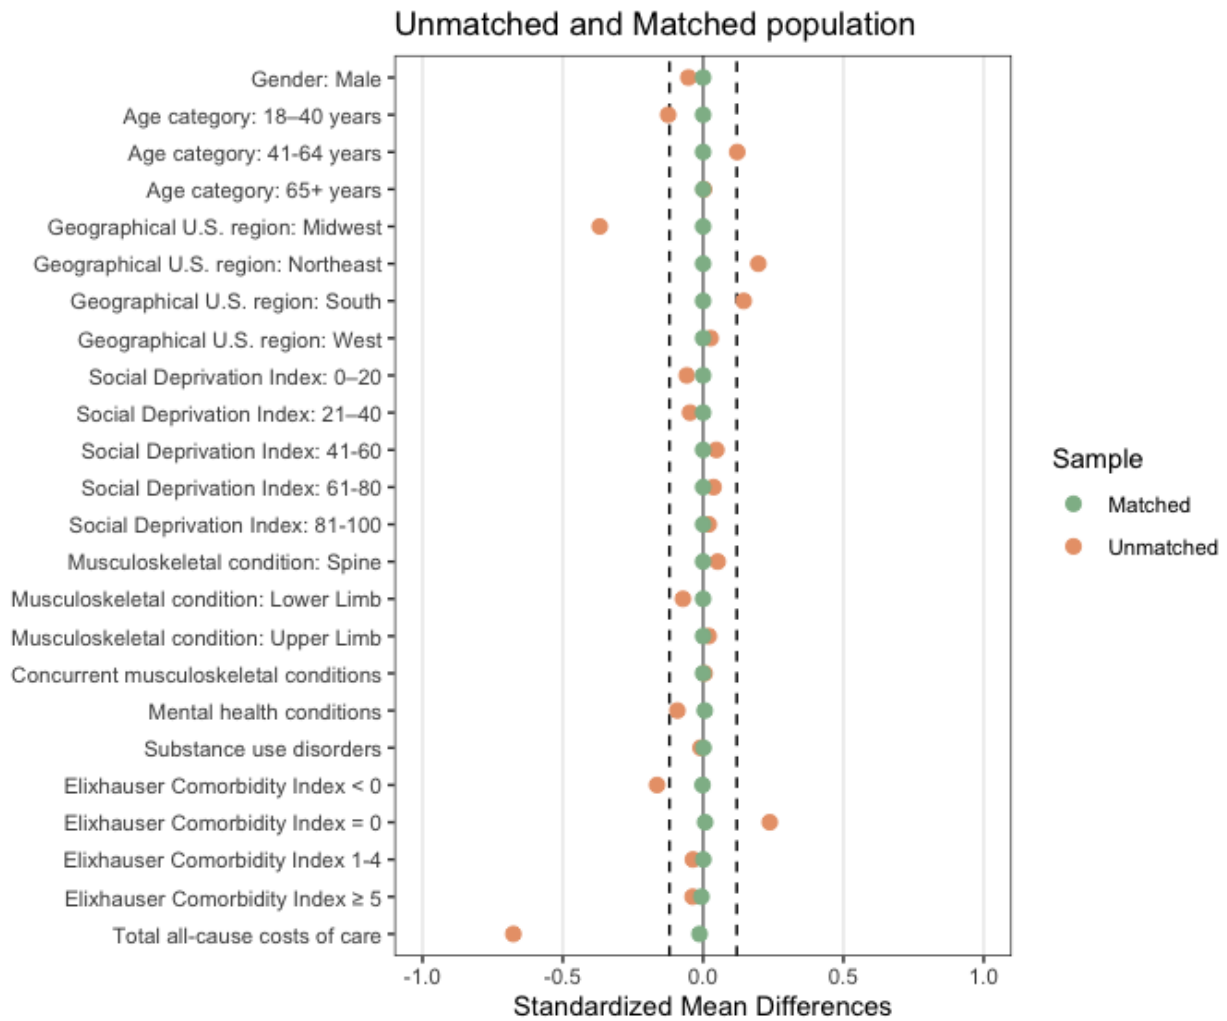

**Supplementary Figure 4.** Standardized mean differences for all matching variables.

**Supplementary Table 16.** Comparison of opioid utilization outcomes between intervention and comparator groups in the matched population, using a more stringent definition of opioid initiation ( $\geq 2$  prescriptions or  $\geq 1$  prescription with higher-tablet counts).

| <b>Outcomes</b>                              | <b>Intervention group</b>   | <b>Comparator group</b>     | <b>Absolute Difference</b> |        |
|----------------------------------------------|-----------------------------|-----------------------------|----------------------------|--------|
|                                              | N = 4, 244<br>Mean (95% CI) | N = 4, 244<br>Mean (95% CI) | Mean (95% CI)              | p      |
| <b>Opioid initiation rates, %</b>            | 2.2 (1.8; 2.7)              | 5.0 (4.4; 5.7)              | 2.8 (2.0; 3.6)             | <0.001 |
| <b>Multiple prescriptions rates, %</b>       | 1.1 (0.8; 1.4)              | 2.9 (2.4; 3.4)              | 1.8 (1.2; 2.4)             | <0.001 |
| <b>Opioid prescriptions per 100 patients</b> | 4.7 (3.4; 6.0)              | 11.8 (9.8; 13.7)            | 7.1 (4.7; 9.4)             | <0.001 |

**Abbreviations:** CI, confidence interval.

**Supplementary Table 17.** Comparison of opioid prescribing patterns among opioid users in the matched population, using a more stringent definition of opioid initiation ( $\geq 2$  prescriptions or  $\geq 1$  prescription with higher-tablet counts).

| Outcomes                                                     | Intervention group      | Comparator group         | Absolute difference |       |
|--------------------------------------------------------------|-------------------------|--------------------------|---------------------|-------|
|                                                              | N = 94<br>Mean (95% CI) | N = 213<br>Mean (95% CI) | Mean/pp (95% CI)    | p     |
| <b>MMEs per day</b>                                          | 37.9 (34.2; 41.6)       | 43.3 (40.1; 46.5)        | 5.4 (0.1; 10.8)     | 0.054 |
| <b>MMEs per day<sup>1</sup> rates</b>                        |                         |                          |                     |       |
| $\geq 50$                                                    | 21.3 (13.0; 29.6)       | 28.2 (22.1; 34.2)        | 6.9 (-3.8; 17.6)    | 0.206 |
| $\geq 90$                                                    | 2.1 (-0.8; 5.0)         | 4.2 (1.5; 6.9)           | 2.1 (-2.4; 6.6)     | 0.364 |
| <b>Opioid Potency relative to morphine<sup>2</sup> rates</b> |                         |                          |                     |       |
| Lower potency than morphine                                  | 34.0 (24.5; 43.6)       | 33.8 (27.5; 40.2)        | -0.2 (-11.8; 11.3)  | 0.968 |
| Equivalent to morphine                                       | 27.7 (18.6; 36.7)       | 23.9 (18.2; 29.7)        | -3.7 (-14.3; 6.9)   | 0.490 |
| Greater potency than morphine                                | 60.6 (50.8; 70.5)       | 61.5 (55.0; 68.0)        | 0.9 (-11.0; 12.8)   | 0.887 |
| <b>DEA Schedule classification<sup>3</sup> rates</b>         |                         |                          |                     |       |
| Schedule IV                                                  | 33.0 (23.5; 42.5)       | 31.5 (25.2; 37.7)        | -1.5 (-12.9; 9.9)   | 0.793 |
| Schedule III                                                 | 1.1 (-1.0; 3.1)         | 2.8 (0.6; 5.0)           | 1.8 (-1.9; 5.4)     | 0.345 |
| Schedule II                                                  | 76.6 (68.0; 85.2)       | 73.7 (67.8; 79.6)        | -2.9 (-13.5; 7.8)   | 0.594 |

**Abbreviations:** CI, confidence interval; DEA, Drug Enforcement Administration; MME, morphine milligram equivalent. **Note:** <sup>1</sup>MMEs were obtained by converting each dispensed opioid prescription using published conversion factors<sup>5-7</sup> based on opioid type, strength, and quantity dispensed (Supplementary Table 23). <sup>2</sup>Drug potency relative to morphine considering published equianalgesic dose conversion factors<sup>5-7</sup> (Supplementary Table 24). <sup>3</sup> Drug schedule categorized according to the U.S. DEA controlled substance schedules<sup>8,9</sup> (Supplementary Table 24).

**Supplementary Table 18.** Negative control analysis comparing numbers of non-MSK-related drugs (metformin and simvastatin) between the intervention and comparator groups across methodologies.

| Procedure                                                        | Intervention group       |                           | Comparator group         |                           | Difference in differences |       |
|------------------------------------------------------------------|--------------------------|---------------------------|--------------------------|---------------------------|---------------------------|-------|
|                                                                  | Pre-index, mean (95% CI) | Post-index, mean (95% CI) | Pre-index, mean (95% CI) | Post-index, mean (95% CI) | Mean (95% CI)             | p     |
| <b>Inverse Probability Weighting + Multivariable Regression§</b> |                          |                           |                          |                           |                           |       |
| <b>Metformin</b>                                                 | 0.36 (0.36; 0.36)        | 0.37 (0.37; 0.38)         | 0.22 (0.22; 0.22)        | 0.24 (0.24; 0.24)         | 0.00 (-0.03; 0.02)        | 0.860 |
| <b>Simvastatin</b>                                               | 0.07 (0.07; 0.07)        | 0.06 (0.06; 0.06)         | 0.05 (0.05; 0.05)        | 0.04 (0.04; 0.04)         | 0.01 (-0.00; 0.01)        | 0.171 |
| <b>Propensity Score Matching</b>                                 |                          |                           |                          |                           |                           |       |
| <b>Metformin</b>                                                 | 0.28 (0.23; 0.33)        | 0.31 (0.26; 0.36)         | 0.17 (0.13; 0.20)        | 0.17 (0.13; 0.21)         | 0.02 (-0.07; 0.10)        | 0.682 |
| <b>Simvastatin</b>                                               | 0.07 (0.05; 0.09)        | 0.06 (0.05; 0.08)         | 0.04 (0.02; 0.05)        | 0.03 (0.02; 0.05)         | 0.00 (-0.04; 0.03)        | 0.814 |

**Abbreviations:** CI, Confidence Interval; CG, comparator group; IG, intervention group.

**Supplementary Table 19.** STROBE Statement—Checklist of items that should be included in reports of *cohort studies*

| Item                 |   |                                                                                                                                          |                                                                       |
|----------------------|---|------------------------------------------------------------------------------------------------------------------------------------------|-----------------------------------------------------------------------|
| No                   |   | Recommendation                                                                                                                           | Page No                                                               |
| Title and abstract   | 1 | (a) Indicate the study’s design with a commonly used term in the title or the abstract                                                   | Page 2                                                                |
|                      |   | (b) Provide in the abstract an informative and balanced summary of what was done and what was found                                      | Page 2                                                                |
| Introduction         |   |                                                                                                                                          |                                                                       |
| Background/rationale | 2 | Explain the scientific background and rationale for the investigation being reported                                                     | Pages 2-4                                                             |
| Objectives           | 3 | State specific objectives, including any prespecified hypotheses                                                                         | Page 4                                                                |
| Methods              |   |                                                                                                                                          |                                                                       |
| Study design         | 4 | Present key elements of study design early in the paper                                                                                  | Pages 17-18;<br>Figure 1                                              |
| Setting              | 5 | Describe the setting, locations, and relevant dates, including periods of recruitment, exposure, follow-up, and data collection          | Pages 17-22;<br>Supplementary Notes 1-2                               |
| Participants         | 6 | (a) Give the eligibility criteria, and the sources and methods of selection of participants. Describe methods of follow-up               | Pages 18-22;<br>Supplementary Figure 1;<br>Supplementary Table 20-21  |
|                      |   | (b) For matched studies, give matching criteria and number of exposed and unexposed                                                      | Pages 24-25;<br>Supplementary Table 1 & 15;<br>Supplementary Figure 4 |
| Variables            | 7 | Clearly define all outcomes, exposures, predictors, potential confounders, and effect modifiers. Give diagnostic criteria, if applicable | Pages 21-25;<br>Figure 1;                                             |

|                              |     |                                                                                                                                                                                                   |                                                                                  |
|------------------------------|-----|---------------------------------------------------------------------------------------------------------------------------------------------------------------------------------------------------|----------------------------------------------------------------------------------|
|                              |     |                                                                                                                                                                                                   | Supplementary<br>Tables 1 & 20-24                                                |
| Data sources/<br>measurement | 8*  | For each variable of interest, give sources of data and details of methods of assessment (measurement). Describe comparability of assessment methods if there is more than one group              | Pages 20-25;<br>Supplementary<br>Tables 1 & 22-24;<br>Supplementary<br>Notes 1-2 |
| Bias                         | 9   | Describe any efforts to address potential sources of bias                                                                                                                                         | Pages 22-25;<br>Figure 1;<br>Supplementary<br>Tables 1                           |
| Study size                   | 10  | Explain how the study size was arrived at                                                                                                                                                         | Pages 17-21;<br>Supplementary<br>Figure 1                                        |
| Quantitative<br>variables    | 11  | Explain how quantitative variables were handled in the analyses. If applicable, describe which groupings were chosen and why                                                                      | Pages 21-25                                                                      |
| Statistical methods          | 12  | (a) Describe all statistical methods, including those used to control for confounding                                                                                                             | Pages 22-25;<br>Supplementary<br>Tables 1                                        |
|                              |     | (b) Describe any methods used to examine subgroups and interactions                                                                                                                               | Pages 23-24;<br>Supplementary<br>Tables 23-24                                    |
|                              |     | (c) Explain how missing data were addressed                                                                                                                                                       | -                                                                                |
|                              |     | (d) If applicable, explain how loss to follow-up was addressed                                                                                                                                    | -                                                                                |
|                              |     | (e) Describe any sensitivity analyses                                                                                                                                                             | Pages 24-25;<br>Supplementary<br>Tables 1 & 22                                   |
| <b>Results</b>               |     |                                                                                                                                                                                                   |                                                                                  |
| Participants                 | 13* | (a) Report numbers of individuals at each stage of study—eg numbers potentially eligible, examined for eligibility, confirmed eligible, included in the study, completing follow-up, and analysed | Pages 4-5 & 11;<br>Supplementary<br>Figure 1;<br>Supplementary<br>Tables 20-21   |

|                  |     |                                                                                                                                                                                                              |                                                                                      |
|------------------|-----|--------------------------------------------------------------------------------------------------------------------------------------------------------------------------------------------------------------|--------------------------------------------------------------------------------------|
|                  |     | (b) Give reasons for non-participation at each stage                                                                                                                                                         | Pages 4-5 & 11                                                                       |
|                  |     | (c) Consider use of a flow diagram                                                                                                                                                                           | Supplementary Figure 1                                                               |
| Descriptive data | 14* | (a) Give characteristics of study participants (eg demographic, clinical, social) and information on exposures and potential confounders                                                                     | Pages 4-5; Table 1; Supplementary Table 2; Supplementary Figure 2-3                  |
|                  |     | (b) Indicate number of participants with missing data for each variable of interest                                                                                                                          | -                                                                                    |
|                  |     | (c) Summarise follow-up time (eg, average and total amount)                                                                                                                                                  | Page 4                                                                               |
| Outcome data     | 15* | Report numbers of outcome events or summary measures over time                                                                                                                                               | Pages 6-12; Figure 2; Supplementary Tables 2-18                                      |
| Main results     | 16  | (a) Give unadjusted estimates and, if applicable, confounder-adjusted estimates and their precision (eg, 95% confidence interval). Make clear which confounders were adjusted for and why they were included | Pages 6-12; Figure 2; Table 1; Supplementary Figure 2-3<br>Supplementary Tables 2-14 |
|                  |     | (b) Report category boundaries when continuous variables were categorized                                                                                                                                    | Pages 9-11; Figure 2; Table 1; Supplementary Tables 2 & 7-10                         |
|                  |     | (c) If relevant, consider translating estimates of relative risk into absolute risk for a meaningful time period                                                                                             | -                                                                                    |
| Other analyses   | 17  | Report other analyses done—eg analyses of subgroups and interactions, and sensitivity analyses                                                                                                               | Pages 7-12; Figure 2; Supplementary Figure 4; Supplementary Tables 6 & 11-13 & 15-18 |

Discussion

|                   |    |                                                                                                                                                                            |             |
|-------------------|----|----------------------------------------------------------------------------------------------------------------------------------------------------------------------------|-------------|
| Key results       | 18 | Summarise key results with reference to study objectives                                                                                                                   | Pages 12-13 |
| Limitations       | 19 | Discuss limitations of the study, taking into account sources of potential bias or imprecision. Discuss both direction and magnitude of any potential bias                 | Page 16     |
| Interpretation    | 20 | Give a cautious overall interpretation of results considering objectives, limitations, multiplicity of analyses, results from similar studies, and other relevant evidence | Pages 12-17 |
| Generalisability  | 21 | Discuss the generalisability (external validity) of the study results                                                                                                      | Pages 12-17 |
| Other information |    |                                                                                                                                                                            |             |
| Funding           | 22 | Give the source of funding and the role of the funders for the present study and, if applicable, for the original study on which the present article is based              | Page 26     |

\*Give information separately for exposed and unexposed groups.

Note: An Explanation and Elaboration article discusses each checklist item and gives methodological background and published examples of transparent reporting. The STROBE checklist is best used in conjunction with this article (freely available on the Web sites of PLoS Medicine at <http://www.plosmedicine.org/>, Annals of Internal Medicine at <http://www.annals.org/>, and Epidemiology at <http://www.epidem.com/>). Information on the STROBE Initiative is available at <http://www.strobe-statement.org>.

**Supplementary Table 20.** Categorized ICD-10 Codes used to identify patients eligible for the study.

| <b>ICD-10 Major Category (3-digit)</b> | <b>Diagnostic Category</b>           | <b>Full ICD-10 Codes</b>                                                                                                                                                                                                                                                                                                  |
|----------------------------------------|--------------------------------------|---------------------------------------------------------------------------------------------------------------------------------------------------------------------------------------------------------------------------------------------------------------------------------------------------------------------------|
| G54                                    | Nerve root and plexus disorders      | G54, G540, G541, G542, G543, G544                                                                                                                                                                                                                                                                                         |
| G56                                    | Mononeuropathies of upper limb       | G56, G5600, G5601, G5602, G5603, G5611, G5612, G5613, G5620, G5621, G5622, G5623, G5630, G5631, G5632, G5633, G5640, G5641, G5642, G5643, G5680, G5681, G5682, G5683, G5690, G5691, G5692, G5693                                                                                                                          |
| G57                                    | Mononeuropathies of lower limb       | G57, G5700, G5701, G5702, G5703, G5710, G5711, G5712, G5713, G5720, G5721, G5722, G5723, G5730, G5731, G5732, G5733, G5740, G5741, G5742, G5743, G5750, G5751, G5752, G5753, G5760, G5761, G5762, G5763, G5770, G5771, G5772, G5773, G5780, G5781, G5782, G5783, G5790, G5791, G5792, G5793                               |
| M12                                    | Other and unspecified arthropathy    | M12, M123, M1230, M1231, M1232, M1233, M1234, M1235, M1236, M1237, M1238, M1239, M124, M1240, M1241, M1242, M1243, M1244, M1245, M1246, M1247, M1248, M1249, M125, M1250, M1251, M1252, M1253, M1254, M1255, M1256, M1257, M1258, M1259, M128, M1280, M1281, M1282, M1283, M1284, M1285, M1286, M1287, M1288, M1289, M129 |
| M13                                    | Other arthritis                      | M13, M1310, M1311, M1312, M1313, M1314, M1315, M1316, M1317, M1380, M1381, M1382, M1383, M1384, M1385, M1386, M1387, M1388, M1389                                                                                                                                                                                         |
| M14                                    | Arthropathies in other diseases      | M14, M146, M1460, M1461, M1462, M1463, M1464, M1465, M1466, M1467, M1468, M1469, M148, M1480, M1481, M1482, M1483, M1484, M1485, M1486, M1487, M1488, M1489                                                                                                                                                               |
| M15                                    | Polyarthrosis                        | M15, M150, M151, M152, M153, M154, M158, M159                                                                                                                                                                                                                                                                             |
| M16                                    | Osteoarthritis of hip                | M16, M160, M1610, M1611, M1612, M162, M1630, M1631, M1632, M164, M1650, M1651, M1652, M166, M167, M169                                                                                                                                                                                                                    |
| M17                                    | Osteoarthritis of knee               | M17, M170, M1710, M1711, M1712, M172, M1730, M1731, M1732, M174, M175, M179                                                                                                                                                                                                                                               |
| M19                                    | Other and unspecified osteoarthritis | M19, M1901, M1902, M1903, M1904, M1907, M1909, M1911, M1912, M1913, M1914, M1917, M1919, M1921, M1922, M1923, M1924, M1927, M1929, M1990, M1991, M1992, M1993                                                                                                                                                             |
| M21                                    | Other acquired deformities of limbs  | M21, M2100, M2102, M2105, M2106, M2107, M211, M2110, M2112, M2115, M2116, M2117, M212, M2120, M2121, M2122, M2123, M2124, M2125, M2126, M2127                                                                                                                                                                             |
| M22                                    | Disorder of patella                  | M22, M2200, M2201, M2202, M2210, M2211, M2212, M222X, M223X,                                                                                                                                                                                                                                                              |

|     |                                                |                                                                                                                                                                                                                                                                                                                                                                                                                                                                                         |
|-----|------------------------------------------------|-----------------------------------------------------------------------------------------------------------------------------------------------------------------------------------------------------------------------------------------------------------------------------------------------------------------------------------------------------------------------------------------------------------------------------------------------------------------------------------------|
|     |                                                | M2240, M2241, M2242, M228X, M2290, M2291, M2292                                                                                                                                                                                                                                                                                                                                                                                                                                         |
| M23 | Internal derangement of knee                   | M23, M230, M2300, M2301, M2302, M2303, M2304, M2305, M2306, M232, M2320, M2321, M2322, M2323, M2324, M2325, M2326, M233, M2330, M2331, M2332, M2333, M2334, M2335, M2336, M234, M2340, M2341, M2342, M235, M2350, M2351, M2352, M236, M2360, M2361, M2362, M2363, M2364, M2367, M238, M238X, M239, M2390, M2391, M2392                                                                                                                                                                  |
| M24 | Other specific joint derangements              | M24, M240, M2400, M2401, M2402, M2403, M2404, M2405, M2407, M241, M2410, M2411, M2412, M2413, M2414, M2415, M2417, M242, M2420, M2421, M2422, M2423, M2424, M2425, M2427, M2428, M2429, M243, M2430, M2431, M2432, M2433, M2434, M2435, M2436, M2437, M2439, M2440, M2441, M2442, M2443, M2444, M2445, M2446, M2447, M245, M2450, M2451, M2452, M2453, M2454, M2455, M2456, M2457, M247, M248, M2480, M2481, M2482, M2483, M2484, M2485, M2487, M2489, M249                             |
| M25 | Other joint disorder, not elsewhere classified | M25, M251, M2511, M2512, M2513, M2514, M2515, M2516, M2517, M2518, M253, M2530, M2531, M2532, M2533, M2534, M2535, M2536, M2537, M2539, M254, M2540, M2541, M2542, M2543, M2544, M2545, M2546, M2547, M2548, M255, M2550, M2551, M2552, M2553, M2554, M2555, M2556, M2557, M256, M2560, M2561, M2562, M2563, M2564, M2565, M2566, M2567, M2569, M257, M2570, M2571, M2572, M2573, M2574, M2575, M2576, M2577, M2578, M258, M2580, M2581, M2582, M2583, M2584, M2585, M2586, M2587, M259 |
| M40 | Kyphosis and lordosis                          | M40, M4000, M4003, M4004, M4005, M4010, M4012, M4013, M4014, M4015, M4020, M4029, M4030, M4035, M4036, M4037, M4040, M4045, M4046, M4047, M4050, M4055, M4056, M4057                                                                                                                                                                                                                                                                                                                    |
| M41 | Scoliosis                                      | M41, M4100, M4102, M4103, M4104, M4105, M4106, M4107, M4108, M4111, M4112, M4120, M4122, M4123, M4124, M4125, M4126, M4127, M4130, M4134, M4135, M4140, M4141, M4142, M4143, M4144, M4145, M4146, M4147, M4150, M4152, M4153, M4154, M4155, M4156, M4157, M4180, M4182, M4183, M4184, M4185, M4186, M4187                                                                                                                                                                               |
| M42 | Spinal osteochondrosis                         | M42, M4200, M4201, M4202, M4203, M4204, M4205, M4206, M4207, M4208, M4209, M4210, M4211, M4212, M4213, M4214, M4215, M4216, M4217, M4218, M4219, M429                                                                                                                                                                                                                                                                                                                                   |
| M43 | Other deforming dorsopathies                   | M43, M431, M4310, M4311, M4312, M4313, M4314, M4315, M4316, M4317, M4318, M4319, M432, M4320, M4321, M4322, M4323, M4324, M4325, M4326, M4327, M4328, M435, M435X, M438, M438X, M439                                                                                                                                                                                                                                                                                                    |
| M45 | Ankylosing spondylitis                         | M45, M450, M451, M452, M453, M454, M455, M456, M457, M458, M459                                                                                                                                                                                                                                                                                                                                                                                                                         |
| M46 | Other inflammatory spondylopathies             | M46, M460, M4600, M4601, M4602, M4603, M4604, M4605, M4606, M4607, M4608, M4609, M461, M468, M4680, M4681, M4682, M4683, M4684, M4685, M4686, M4687, M4688, M4689, M469, M4690, M4691, M4692, M4693, M4694, M4695, M4696, M4697, M4698, M4699                                                                                                                                                                                                                                           |

|     |                                                                        |                                                                                                                                                                                                                                                                                                                                                                                                 |
|-----|------------------------------------------------------------------------|-------------------------------------------------------------------------------------------------------------------------------------------------------------------------------------------------------------------------------------------------------------------------------------------------------------------------------------------------------------------------------------------------|
| M47 | Spondylosis                                                            | M47, M4720, M4721, M4722, M4723, M4724, M4725, M4726, M4727, M4728, M4781, M4789, M479                                                                                                                                                                                                                                                                                                          |
| M48 | Other spondylopathies                                                  | M4820, M4821, M4822, M4823, M4824, M4825, M4826, M4827, M4830, M4831, M4832, M4833, M4834, M4835, M4836, M4837, M4838, M488X, M489                                                                                                                                                                                                                                                              |
| M49 | Spondylopathies in diseases classified elsewhere                       | M4980, M4981, M4982, M4983, M4984, M4985, M4986, M4987, M4988, M4989                                                                                                                                                                                                                                                                                                                            |
| M50 | Cervical disc disorders                                                | M5010, M5011, M5012, M5013, M5020, M5021, M5022, M5023, M5030, M5031, M5032, M5033, M5080, M5081, M5082, M5083, M5090, M5091, M5092, M5093                                                                                                                                                                                                                                                      |
| M51 | Thoracic, thoracolumbar, and lumbosacral intervertebral disc disorders | M5114, M5115, M5116, M5117, M5124, M5125, M5126, M5127, M5134, M5135, M5136, M5137, M5144, M5145, M5146, M5147, M5184, M5185, M5186, M5187, M519                                                                                                                                                                                                                                                |
| M53 | Other and unspecified dorsopathies, not elsewhere classified           | M530, M531, M532X, M533, M5380, M5381, M5382, M5383, M5384, M5385, M5386, M5387, M5388, M539                                                                                                                                                                                                                                                                                                    |
| M54 | Dorsalgia                                                              | M5410, M5411, M5412, M5413, M5414, M5415, M5416, M5417, M5418, M542, M5430, M5431, M5432, M5440, M5441, M5442, M545, M5450, M5451, M5459, M546, M549                                                                                                                                                                                                                                            |
| M62 | Other disorders of muscle                                              | M6200, M6201, M6202, M6203, M6204, M6205, M6206, M6207, M6208, M6211, M6212, M6213, M6214, M6215, M6216, M6217, M6240, M6241, M6242, M6243, M6244, M6245, M6246, M6247, M6248, M6249, M6251, M6254, M6255, M6256, M6257, M6258, M6259, M6281, M6283, M6289, M629                                                                                                                                |
| M65 | Synovitis and tenosynovitis                                            | M6520, M6522, M6523, M6524, M6525, M6526, M6527, M6528, M654, M6580, M6581, M6582, M6583, M6584, M6585, M6586, M6587, M6588, M659                                                                                                                                                                                                                                                               |
| M66 | Spontaneous rupture of synovium and tendon                             | M6611, M6612, M6613, M6614, M6615, M6617, M6620, M6621, M6622, M6623, M6624, M6625, M6626, M6627, M6628, M6629, M6630, M6631, M6632, M6633, M6634, M6635, M6636, M6637, M6638, M6639, M6680, M6681, M6682, M6683, M6684, M6685, M6686, M6687, M6688, M6689, M669                                                                                                                                |
| M67 | Other disorders of synovium and tendon                                 | M6700, M6701, M6702, M6720, M6721, M6722, M6723, M6724, M6725, M6726, M6727, M6728, M6729, M6730, M6731, M6732, M6733, M6734, M6735, M6736, M6737, M6738, M6739, M6740, M6741, M6742, M6743, M6744, M6745, M6746, M6747, M6748, M6749, M6750, M6751, M6752, M6780, M6781, M6782, M6783, M6784, M6785, M6786, M6787, M6788, M6789, M6790, M6791, M6792, M6793, M6794, M6795, M6796, M6797, M6798 |
| M70 | Soft tissue disorders                                                  | M7003, M7004, M7010, M7011, M7012, M7020, M7021, M7022, M7030,                                                                                                                                                                                                                                                                                                                                  |

|     |                                                                                                                   |                                                                                                                                                                                                                                                                                       |
|-----|-------------------------------------------------------------------------------------------------------------------|---------------------------------------------------------------------------------------------------------------------------------------------------------------------------------------------------------------------------------------------------------------------------------------|
|     | related to use, overuse and pressure                                                                              | M7031, M7032, M7040, M7041, M7042, M7050, M7051, M7052, M7060, M7061, M7062, M7070, M7071, M7072, M7080, M7081, M7082, M7083, M7084, M7085, M7086, M7087, M7088, M7089, M7090, M7091, M7092, M7093, M7094, M7095, M7096, M7097, M7098, M7099                                          |
| M71 | Other bursopathies                                                                                                | M7120, M7121, M7122, M7130, M7131, M7132, M7133, M7134, M7135, M7137, M7138, M7139, M7140, M7142, M7143, M7144, M7145, M7146, M7147, M7148, M7149, M7150, M7152, M7153, M7154, M7155, M7156, M7157, M7158, M7180, M7181, M7182, M7183, M7184, M7185, M7186, M7187, M7188, M7189, M719 |
| M75 | Shoulder lesions                                                                                                  | M7500, M7501, M7502, M7510, M7511, M7512, M7520, M7521, M7522, M7530, M7531, M7532, M7540, M7541, M7542, M7550, M7551, M7552, M7580, M7581, M7582, M7590, M7591, M7592                                                                                                                |
| M76 | Enthesopathies, lower limb, excluding foot                                                                        | M7600, M7601, M7602, M7610, M7611, M7612, M7620, M7621, M7622, M7630, M7631, M7632, M7640, M7641, M7642, M7650, M7651, M7652, M7660, M7661, M7662, M7670, M7671, M7672, M7681, M7682, M7689, M769                                                                                     |
| M77 | Other enthesopathies                                                                                              | M7700, M7701, M7702, M7710, M7711, M7712, M7720, M7721, M7722, M7750, M7751, M7752, M778, M779                                                                                                                                                                                        |
| M79 | Other and unspecified soft tissue disorders, not elsewhere classified                                             | M7912, M7918, M794, M7960, M7962, M7963, M7964, M7965, M7966, M7967                                                                                                                                                                                                                   |
| M84 | Disorder of continuity of bone                                                                                    | M8430, M8431, M8432, M8433, M8434, M8435, M8436, M8437                                                                                                                                                                                                                                |
| M93 | Other osteochondropathies                                                                                         | M9320, M9321, M9322, M9323, M9324, M9325, M9326, M9327, M9328, M9329, M9380, M9381, M9382, M9383, M9384, M9385, M9386, M9387, M9388, M9389                                                                                                                                            |
| M94 | Other disorders of cartilage                                                                                      | M9420, M9421, M9422, M9423, M9424, M9425, M9426, M9427, M9428, M9429, M9435, M948X                                                                                                                                                                                                    |
| M95 | Other acquired deformities of musculoskeletal system and connective tissue                                        | M953, M955                                                                                                                                                                                                                                                                            |
| M96 | Intraoperative and postprocedural complications and disorders of musculoskeletal system, not elsewhere classified | M961                                                                                                                                                                                                                                                                                  |
| M99 | Biomechanical lesions, not elsewhere                                                                              | M9901, M9902, M9903, M9904, M9905, M9906, M9911, M9912, M9913, M9914, M9915, M9916, M9961, M9962, M9963, M9964, M9965, M9966,                                                                                                                                                         |

|     |                                                                                            |                                                                                                                                     |
|-----|--------------------------------------------------------------------------------------------|-------------------------------------------------------------------------------------------------------------------------------------|
|     | classified                                                                                 | M9967, M9969, M9970, M9971, M9972, M9973, M9974, M9975, M9976, M9977                                                                |
| S13 | Dislocation and sprain of joints and ligaments at neck level                               | S134X, S138X, S139X                                                                                                                 |
| S16 | Injury of muscle, fascia and tendon at neck level                                          | S161X, S168X, S169X                                                                                                                 |
| S30 | Superficial injury of abdomen, lower back, pelvis and external genitals                    | S300X                                                                                                                               |
| S33 | Dislocation and sprain of joints and ligaments of lumbar spine and pelvis                  | S335X, S336X, S338X, S339X                                                                                                          |
| S34 | Injury of lumbar and sacral spinal cord and nerves at abdomen, lower back and pelvis level | S3421, S3422                                                                                                                        |
| S39 | Other and unspecified injuries of abdomen, lower back, pelvis and external genitals        | S3901, S3909, S3982, S3992                                                                                                          |
| S40 | Superficial injury of shoulder and upper arm                                               | S4001, S4002                                                                                                                        |
| S43 | Dislocation and sprain of joints and ligaments of shoulder girdle                          | S4330, S4340, S4341, S4342, S4343, S4349, S4350, S4351, S4352, S4380, S4381, S4382, S4390, S4391, S4392                             |
| S44 | Injury of nerves at shoulder and upper arm level                                           | S4400, S4401, S4402, S4410, S4411, S4412, S4420, S4421, S4422, S4430, S4431, S4432, S4440, S4441, S4442, S448X, S4490, S4491, S4492 |
| S46 | Injury of muscle, fascia and tendon at shoulder and upper arm level                        | S4600, S4601, S4609, S4610, S4611, S4619, S4620, S4621, S4629, S4630, S4631, S4639, S4680, S4681, S4689, S4690, S4691, S4699        |
| S50 | Superficial injury of elbow and forearm                                                    | S5000, S5001, S5002, S5010, S5011, S5012                                                                                            |
| S53 | Dislocation and sprain of joints and ligaments                                             | S5340, S5341, S5342, S5343, S5344, S5349                                                                                            |

|     |                                                                             |                                                                                                                                                                               |
|-----|-----------------------------------------------------------------------------|-------------------------------------------------------------------------------------------------------------------------------------------------------------------------------|
|     | of elbow                                                                    |                                                                                                                                                                               |
| S54 | Injury of nerves at forearm level                                           | S5400, S5401, S5402, S5410, S5411, S5412, S5420, S5421, S5422, S548X, S5490, S5491, S5492                                                                                     |
| S56 | Injury of muscle, fascia and tendon at forearm level                        | S5620, S5621, S5629                                                                                                                                                           |
| S59 | Other and unspecified injuries of elbow and forearm                         | S5980, S5981, S5990, S5991                                                                                                                                                    |
| S60 | Superficial injury of wrist, hand and fingers                               | S6021, S6022                                                                                                                                                                  |
| S63 | Dislocation and sprain of joints and ligaments at wrist and hand level      | S6350, S6351, S6352, S6359                                                                                                                                                    |
| S70 | Superficial injury of hip and thigh                                         | S7000, S7001, S7002, S7010, S7011, S7012                                                                                                                                      |
| S73 | Dislocation and sprain of joint and ligaments of hip                        | S7310, S7311, S7312, S7319                                                                                                                                                    |
| S76 | Injury of muscle, fascia and tendon at hip and thigh level                  | S7600, S7601, S7609, S7610, S7611, S7619, S7620, S7621, S7629, S7630, S7631, S7639, S7680, S7681, S7682, S7689, S7690, S7691, S7699                                           |
| S83 | Fracture of lower leg, including ankle                                      | S8320, S8321, S8322, S8323, S8324, S8325, S8326, S8327, S8328, S8330, S8331, S8332, S8340, S8341, S8342, S8350, S8351, S8352, S8360, S8361, S8362, S838X, S8390, S8391, S8392 |
| S86 | Injury of muscle, fascia and tendon at lower leg level                      | S8600, S8601, S8609, S8610, S8611, S8619, S8620, S8621, S8629, S8630, S8631, S8639, S8680, S8681, S8682, S8689, S8690, S8691, S8692, S8699                                    |
| S89 | Other and unspecified injuries of lower leg                                 | S8980, S8981, S8982, S8990, S8991, S8992                                                                                                                                      |
| S90 | Superficial injury of ankle, foot and toes                                  | S9000, S9001, S9002                                                                                                                                                           |
| S93 | Dislocation and sprain of joints and ligaments at ankle, foot and toe level | S9340, S9341, S9342, S9343, S9349, S9360, S9369                                                                                                                               |
| S94 | Injury of nerves at ankle and foot level                                    | S9400, S9401, S9402, S9410, S9411, S9412, S9420, S9421, S9422, S9430, S9431, S9432, S948X, S9490, S9491, S9492                                                                |
| S99 | Other and unspecified injuries of ankle and foot                            | S9981, S9991                                                                                                                                                                  |

|     |                                       |                                          |
|-----|---------------------------------------|------------------------------------------|
| Z96 | Presence of other functional implants | Z9661, Z9662, Z9663, Z9664, Z9665, Z9666 |
|-----|---------------------------------------|------------------------------------------|

**Abbreviation:** ICD-10, International Classification of Diseases, Tenth Revision.

**Supplementary Table 21.** Categorized ICD-10 Codes used to identify patients with conditions that warrant exclusion from the study.

| <b>Diagnostic Category</b>                                     | <b>Full Codes</b>                            |
|----------------------------------------------------------------|----------------------------------------------|
| Neoplasms                                                      | NEO001-NEO025, NEO028-NEO071 (except NEO073) |
| Perinatal period, and Pregnancy, Childbirth and the Puerperium | PNL001-PNL013, PRG001-PRG030                 |
| Dementia, Cognitive impairment or Intellectual disabilities    | F01-F03, F70-F79, G20, G30, G71, R26         |
| Traumatic injuries                                             | S00–S99                                      |
| Poisoning, burns, and other injury complications               | T00–T88                                      |
| Transport accidents                                            | V00–V99                                      |
| Falls and environmental injuries                               | W00–W99                                      |
| Exposure, toxic effects, and self-harm                         | X00–X99                                      |
| Assault and other external causes                              | Y00–Y99                                      |
| Severe neurologic or systemic conditions                       | G82, R57                                     |
| Severe stress disorders                                        | F43                                          |
| Encounter/status exclusions                                    | Z90                                          |

**Abbreviation:** ICD-10, International Classification of Diseases, Tenth Revision.

**Supplementary Note 1.** Brief description of PurpleLab data source.

PurpleLab is one of the largest claims data repositories in the US (covering millions of lives) and aggregates fully adjudicated, payer sourced claims via direct feeds and partnerships rather than purchasing a commercial database license. In practice, that means:

**Third-Party Administrators (TPAs) & Self-Insured Employers**

Clients deliver member eligibility & claims extracts (medical, pharmacy, ancillary) via secure SFTP or API. These feeds span both national administrators and large regional/local TPAs.

**National & Regional Carrier Partnerships**

For fully insured groups, PurpleLab ingests de-identified claims from major carriers under data-share agreements.

Key data elements available:

1. Enrollment files: demographics, eligibility history (coverage dates, plan tier, employer ID);
2. Medical claims: inpatient, outpatient, office, emergency room, imaging, surgery, ancillary; includes ICD-10, CPT/HCPCS, place-of-service, provider National Provider Identifier, billed/allowed/paid amounts;
3. Pharmacy claims: Outpatient prescription dispensing records including National Drug Codes (NDC), drug name and class, dispensing date, quantity, days of supply, refill information, pharmacy identifier, and paid amounts.

4. Ancillary & lab: select lab orders/results, Durable Medical Equipment (DME), home health;
5. Longitudinal linkage via de-identified member & claim IDs.

## **Supplementary Note 2. Claims Classification and Validation Procedures.**

To ensure accurate and consistent classification of musculoskeletal (MSK)-related claims, we applied a standardized data validation protocol aligned with established recommendations for retrospective claims analyses<sup>10,11</sup>.

MSK-related diagnoses within the scope of physical therapy were identified using ICD-10 codes. Misclassified or clinically irrelevant codes were excluded, and consistency checks were performed to flag implausible sequences (e.g., surgery preceding diagnosis). All cost data were normalized using CMS Fee Schedules to reduce payer-level variability and ensure comparability across claims.

**Supplementary Table 22.** Opioid Drug Families and Associated National Drug Codes (NDC) and Current Procedural Terminology/Healthcare Common Procedure Coding System (CPT/HCPCS).

| Opioid family          | NDC/CPT/HCPCS                                                                                                                                                                                                                                                                                                                                                                                                                                                                                                                                                                                                                                                                                                                                                                                                                                                                                                                                                                                                                                                                                                                                                                                                                                                                                                                                                                                                       |
|------------------------|---------------------------------------------------------------------------------------------------------------------------------------------------------------------------------------------------------------------------------------------------------------------------------------------------------------------------------------------------------------------------------------------------------------------------------------------------------------------------------------------------------------------------------------------------------------------------------------------------------------------------------------------------------------------------------------------------------------------------------------------------------------------------------------------------------------------------------------------------------------------------------------------------------------------------------------------------------------------------------------------------------------------------------------------------------------------------------------------------------------------------------------------------------------------------------------------------------------------------------------------------------------------------------------------------------------------------------------------------------------------------------------------------------------------|
| <b>Pharmacy claims</b> |                                                                                                                                                                                                                                                                                                                                                                                                                                                                                                                                                                                                                                                                                                                                                                                                                                                                                                                                                                                                                                                                                                                                                                                                                                                                                                                                                                                                                     |
| <b>Buprenorphine</b>   | 121101930, 121203830, 12496075701, 12496075705, 228315303, 228315603, 409201203, 409201232, 42023017901, 42023017905, 42858035340, 42858049340, 42858050103, 42858050203, 42858058640, 42858075040, 42858083940, 47781040604, 47781040704, 47781040804, 47781041904, 50383092493, 50383093093, 50742037204, 50742037304, 50742037404, 50742037504, 50742037604, 54017613, 54017713, 59011075004, 59011075104, 59011075204, 59011075704, 59011075804, 59385002160, 59385002201, 59385002260, 59385002360, 59385002401, 59385002460, 59385002501, 59385002560, 59385002660, 59385002760, 60505707505, 60505707605, 60505707705, 60505707805, 60505707905, 60687048111, 60687048121, 60687049211, 60687049221, 62756045983, 62756046083, 63481051960, 69238120202, 69238120302, 69238120402, 69238120502, 69238150502, 71335095003, 71335116303, 72888018230, 72888018330, 904715404, 904715504, 93323921, 93323940, 93360140, 93360321, 93360340, 93365621, 93365640, 93365740, 93365840, 93365940                                                                                                                                                                                                                                                                                                                                                                                                                    |
| <b>Codeine</b>         | 121050400, 121050404, 121050405, 121050416, 121050440, 121100840, 13107005801, 13107005901, 13107005999, 13107006001, 13107006005, 13107006099, 17856006501, 21695025860, 33358000160, 349232401, 406048301, 406048401, 406048403, 406048410, 406048423, 406048462, 406048501, 406048505, 42195084010, 43063055424, 49999002660, 50090301101, 50090461000, 50090520004, 50383007906, 50383007916, 50383033913, 50458051380, 51079016101, 51079016120, 51991007301, 51991007401, 51991007405, 52544008201, 527131201, 527169801, 52959000325, 52959000328, 52959044630, 536322705, 54569002502, 55289000598, 55887030930, 603233721, 603233821, 603233832, 603255321, 60687060401, 60687061501, 615043053, 61919032830, 63187010615, 63629118501, 63629118701, 63629149403, 63629149406, 63629294501, 63629303101, 63629685102, 63739000410, 63874020290, 64380044601, 64380044701, 64380044801, 64850064101, 64850064201, 64850064301, 64950037416, 65162003310, 65162003311, 66267000120, 66267099704, 66992084010, 67544000253, 67544000260, 67544000353, 68084037201, 68084037211, 68115000112, 68115000190, 69238199301, 71335033606, 71335054509, 71610011145, 71610011146, 71610011160, 71610011170, 71930005412, 71930005452, 71930005512, 71930005552, 71930005612, 71930005652, 72162200201, 72189037660, 76420010330, 879000252, 93005001, 93015001, 93015010, 157042101, 580045201, 719003310, 781166005 |
| <b>Fentanyl</b>        | 10019003725, 10019003727, 143939110, 143939210, 17478003002, 17478003005, 17478006702, 378911998, 378912116, 378912198, 378912298, 378912316, 378912398, 378912498, 378912598, 378912616, 378912698, 378912798, 38779175603, 38779175604, 406900076, 406901276, 406902576, 406903776, 406905076, 406906276, 406907576, 406910076, 406911276, 406912576, 406915076, 406917576, 406920230, 409127603, 409127632, 409338221, 409909309, 409909311, 409909332, 409909335, 409909337, 409909345, 409909409, 409909411, 409909412, 409909418, 409909422, 409909425, 409909428, 409909431, 409909441, 409909461, 47781042347, 47781042447, 47781042647, 47781042747, 47781042847, 50742054905, 50742055005, 50742055105, 50742055201, 50742055205, 50742055405, 50742055605, 51552068704, 51552068705, 51862063528, 51862063728, 51862063828, 55887089005, 60505700602, 60505700702, 60505701002, 60505708002, 60505708102, 60505708202, 60505708300, 60505708302, 60505708402, 60505708502, 60505708702, 61553030328, 62991140504, 63323072301,                                                                                                                                                                                                                                                                                                                                                                           |

| <b>Opioid family</b> | <b>NDC/CPT/HCPCS</b>                                                                                                                                                                                                                                                                                                                                                                                                                                                                                                                                                                                                                                                                                                                                                                                                                                                                                                                                                                                                                                                                                                                                                                                                                                                                                                                                                                                                                                                                                                                                                                                                                                                                                                                                                                                                                                                                                                                                                                                                                                                                                                                                                                                                                                                                                                                                                                                                                                                                                                                                                                                                                                                                                                                                                                                                                                                                                                                                                                                                                                                                                                                                                                                                   |
|----------------------|------------------------------------------------------------------------------------------------------------------------------------------------------------------------------------------------------------------------------------------------------------------------------------------------------------------------------------------------------------------------------------------------------------------------------------------------------------------------------------------------------------------------------------------------------------------------------------------------------------------------------------------------------------------------------------------------------------------------------------------------------------------------------------------------------------------------------------------------------------------------------------------------------------------------------------------------------------------------------------------------------------------------------------------------------------------------------------------------------------------------------------------------------------------------------------------------------------------------------------------------------------------------------------------------------------------------------------------------------------------------------------------------------------------------------------------------------------------------------------------------------------------------------------------------------------------------------------------------------------------------------------------------------------------------------------------------------------------------------------------------------------------------------------------------------------------------------------------------------------------------------------------------------------------------------------------------------------------------------------------------------------------------------------------------------------------------------------------------------------------------------------------------------------------------------------------------------------------------------------------------------------------------------------------------------------------------------------------------------------------------------------------------------------------------------------------------------------------------------------------------------------------------------------------------------------------------------------------------------------------------------------------------------------------------------------------------------------------------------------------------------------------------------------------------------------------------------------------------------------------------------------------------------------------------------------------------------------------------------------------------------------------------------------------------------------------------------------------------------------------------------------------------------------------------------------------------------------------------|
|                      | 63323072303, 63323072401, 63323072405, 63323080601, 63323080602, 63323080605, 63323080611, 63323080612, 63323080613, 63323080801, 63323080811, 63629476503, 63629549601, 641602410, 641602501, 641602510, 641602701, 641602725, 641602801, 641602825, 641602901, 641603001, 641624701, 641624725, 641624801, 641624810, 67457019803, 67457019805, 67457019810, 67457091201, 68071137405, 68071137505, 68258201103, 69374052620, 70004020232, 70092109337, 70092109949, 70092110537, 70092116037, 70092140043, 70092150935, 71266505001, 71266917001, 71266922701, 71449001305, 71500000230, 71500000430, 71500000830, 72078003401, 72572017001, 72572017025, 72572017125, 72572017201, 73177010203, 81371201005, 81565020502, 82393011807, 93786565, 93786665, 20482001230                                                                                                                                                                                                                                                                                                                                                                                                                                                                                                                                                                                                                                                                                                                                                                                                                                                                                                                                                                                                                                                                                                                                                                                                                                                                                                                                                                                                                                                                                                                                                                                                                                                                                                                                                                                                                                                                                                                                                                                                                                                                                                                                                                                                                                                                                                                                                                                                                                             |
| <b>Hydrocodone</b>   | 10544031602, 10702018901, 10702018910, 10702018950, 10702019001, 10702019010, 10702019050, 10702019101, 10702019110, 10702019150, 10702019201, 10702019301, 10702019401, 121077204, 121077216, 121154440, 121231615, 121231640, 121477115, 121477205, 121477240, 13107000401, 13107001901, 13107001905, 13107002001, 13107002005, 13107002101, 13107002105, 13107002199, 13811065710, 16590049430, 17478045016, 21695027016, 23600201, 247007990, 247034215, 247061350, 254203401, 27808003501, 27808003502, 27808003503, 27808003601, 27808003602, 27808003603, 27808003701, 27808003702, 27808003703, 27808011401, 27808011501, 27808011502, 27808011601, 31722094101, 31722094105, 31722094201, 31722094205, 31722094301, 31722094305, 31722099601, 31722099605, 31722099701, 31722099705, 33261005412, 33261005607, 33261005636, 33261037990, 35356079590, 35356079630, 406012301, 406012305, 406012310, 406012312, 406012323, 406012330, 406012362, 406012401, 406012405, 406012410, 406012412, 406012423, 406012462, 406012501, 406012505, 406012510, 406012512, 406012523, 406012560, 406012562, 406036523, 406036762, 406037601, 406037605, 406037701, 406037705, 406037801, 406037805, 40893019104, 42291033201, 42858004001, 42858013901, 42858020101, 42858020150, 42858020201, 42858020301, 42858020350, 42858023801, 43063009120, 43063068610, 43063068698, 43353015957, 43353073454, 43353073480, 43386035101, 43386035201, 43386035301, 43386035601, 43386035610, 43386035701, 43386035710, 43386035801, 43386035810, 440761006, 47463036273, 47679082901, 47781039260, 47781039360, 47781039460, 47781039560, 47781039660, 47781039760, 47781040960, 47781041060, 47781041160, 47781041260, 47781041360, 47781041460, 50268040011, 50268040015, 50268040111, 50268040115, 50268040211, 50268040215, 50436261204, 51079077720, 51862058505, 52246007520, 52493019130, 52544096960, 52959032401, 52959048440, 52959052112, 52959053330, 53217026790, 53746010901, 53746010905, 53746010910, 53746011001, 53746011005, 53746011010, 53746011701, 53746014501, 53746014601, 54084363, 54124095818, 54569030300, 54868007108, 54868497403, 55289094460, 55700065221, 55700065230, 57664012613, 57664012688, 57664017013, 57664017088, 57664017688, 58016063221, 58118017607, 59011027160, 59011027260, 59011027360, 59011027460, 59011027560, 59011027660, 59011027760, 591217101, 591217205, 591320201, 603388721, 603388728, 603388732, 603388804, 603389021, 603389028, 603389032, 603389121, 603389128, 603389132, 603389721, 60429059001, 60429059005, 60429059101, 60429059201, 60429059205, 60687039601, 60687039611, 60687040701, 60687040711, 60687041744, 60687041801, 60687041811, 60951064170, 61919011872, 61919049430, 61919061826, 63629153206, 63629193801, 63629193901, 63629194101, 63629229201, 63629229801, 63629229901, 63629230001, 63629295805, 63629473101, 63629542203, 63717089516, 63739032610, 63739053210, 63739070410, 63874020335, 63874023030, 63874029525, 63874083450, 64376064016, 64376064301, 64376064801, 64380044001, 64380044101, 64380044201, 64850063001, 64850063101, 64850063201, 64850063301, 64950034316, 64950037316, 64950037516, 65162011510, 65162011511, |

| Opioid family        | NDC/CPT/HCPCS                                                                                                                                                                                                                                                                                                                                                                                                                                                                                                                                                                                                                                                                                                                                                                                                                                                                                                                                                                                                                                                                                                                                                                                                                                                                                                |
|----------------------|--------------------------------------------------------------------------------------------------------------------------------------------------------------------------------------------------------------------------------------------------------------------------------------------------------------------------------------------------------------------------------------------------------------------------------------------------------------------------------------------------------------------------------------------------------------------------------------------------------------------------------------------------------------------------------------------------------------------------------------------------------------------------------------------------------------------------------------------------------------------------------------------------------------------------------------------------------------------------------------------------------------------------------------------------------------------------------------------------------------------------------------------------------------------------------------------------------------------------------------------------------------------------------------------------------------|
|                      | 65162011550, 65224091560, 66267011014, 66336044412, 66689000401, 66689000450, 66689000550, 66689002301, 66689002304, 66689002316, 66689002350, 67544002370, 67544002593, 68071029625, 68071200103, 68084010001, 68084035311, 68084060101, 68084088411, 68084089501, 68084089509, 68084089511, 70010067301, 71335141704, 71930001912, 71930001913, 71930001952, 71930002012, 71930002013, 71930002052, 71930002112, 71930002113, 71930002152, 71930002743, 71930004212, 71930004312, 71930004412, 72189040790, 72865011101, 72865011201, 76420013330, 82804000330, 904642061, 904682461, 904682561, 904682661                                                                                                                                                                                                                                                                                                                                                                                                                                                                                                                                                                                                                                                                                                 |
| <b>Hydromorphone</b> | 13107010901, 13811070110, 13811070210, 13811070310, 13811070410, 31722011901, 31722012001, 31722012101, 31722012201, 38779073105, 406324301, 406324401, 406324901, 409128303, 409128304, 409128305, 409128309, 409128310, 409128317, 409128331, 409128337, 409130403, 409131203, 409131210, 409131230, 409131236, 409180501, 409255201, 409255211, 409263401, 409263405, 409263450, 409335601, 409335611, 409336501, 409336510, 409336511, 409426401, 409426411, 42858012201, 42858023401, 42858030101, 42858030125, 42858030201, 42858030225, 42858030250, 42858030301, 42858030416, 44101201, 44105301, 49999083590, 527135301, 527135401, 527135501, 54038663, 54437025, 54835016, 574029301, 574029401, 574029501, 574722406, 59011044110, 59011044225, 60687057901, 60687057911, 60687059001, 61553045474, 61553051069, 61553061219, 61553070268, 62991309207, 63275210008, 63323085115, 63323085203, 63323085225, 63323085303, 63323085325, 641012121, 641012125, 641234141, 641615101, 641615125, 641616901, 68084042301, 70092111536, 70092111850, 70092154635, 70092911148, 70092911450, 70092940550, 7030111303, 73177010403, 74131212, 76045000901, 76045000905, 76045000906, 76045000910, 76045000911, 76045000996, 76045001001, 76045001010, 76045001011, 76045012101, 76045012111, 82393011908 |
| <b>Levorphanol</b>   | 406222401, 527323637, 527323737, 54043825, 57664076288, 69543041210, 69543041710, 72989041710                                                                                                                                                                                                                                                                                                                                                                                                                                                                                                                                                                                                                                                                                                                                                                                                                                                                                                                                                                                                                                                                                                                                                                                                                |
| <b>Meperidine</b>    | 409117603, 409117630, 409117803, 409117830, 409118069, 409118130, 409125301, 409125512, 409125601, 409136201, 409136211, 409141801, 42806005030, 54354563, 548192710, 54868515101, 641605201, 641605225, 641605301, 641605325, 641605401, 641605425, 64950021403, 904197840, 24036404                                                                                                                                                                                                                                                                                                                                                                                                                                                                                                                                                                                                                                                                                                                                                                                                                                                                                                                                                                                                                        |
| <b>Methadone</b>     | 13107008801, 13107008901, 16590067015, 31722094601, 31722094701, 406052710, 406412303, 406575501, 406575562, 406577101, 406577162, 406622105, 406622505, 406872510, 527192736, 54070920, 54070925, 54071020, 54071025, 54355344, 54355563, 54355663, 54457025, 54457125, 54855424, 54868285400, 57866707005, 63629102701, 66689069479, 66689082010, 66689083699, 67457021720, 67877011601, 67877065901, 68084073801, 68084073811, 70166028401, 72865012001, 904653061, 904741761                                                                                                                                                                                                                                                                                                                                                                                                                                                                                                                                                                                                                                                                                                                                                                                                                             |
| <b>Morphine</b>      | 10544042328, 115127701, 121082501, 228309011, 228309111, 228309211, 228309311, 228311611, 228311711, 228350106, 228350206, 228350306, 228427011, 228427111, 228431111, 228432311, 27808008201, 27808008202, 34052203, 35356083730, 38779067305, 38779067307, 406152153, 406511801, 406511901, 406800312, 406800315, 406800324, 406800330, 406831501, 406831523, 406831562, 406832001, 406833001, 406833023, 406833062, 406838001, 406838062, 406839001, 406839062, 409113403, 409126069, 409176230, 409189001, 409189003, 409189010, 409189011, 409189013, 409189023, 409189101, 409189103, 409189110, 409189111, 409189113, 409189123, 409189203, 409189301, 409189303, 409189313, 409381411, 409381412, 409381511, 409381512, 42858051501, 42858063101, 42858080101, 42858080201, 42858080301,                                                                                                                                                                                                                                                                                                                                                                                                                                                                                                             |

| Opioid family     | NDC/CPT/HCPCS                                                                                                                                                                                                                                                                                                                                                                                                                                                                                                                                                                                                                                                                                                                                                                                                                                                                                                                                                                                                                                                                                                                                                                                                                                                                                                                                                                                                                                                                                                                                                                                                                                                                                                                                                                                                                                                                                                                                                                                                                                                                                                                                                                                                                                                                                                                                                                                                                                                                         |
|-------------------|---------------------------------------------------------------------------------------------------------------------------------------------------------------------------------------------------------------------------------------------------------------------------------------------------------------------------------------------------------------------------------------------------------------------------------------------------------------------------------------------------------------------------------------------------------------------------------------------------------------------------------------------------------------------------------------------------------------------------------------------------------------------------------------------------------------------------------------------------------------------------------------------------------------------------------------------------------------------------------------------------------------------------------------------------------------------------------------------------------------------------------------------------------------------------------------------------------------------------------------------------------------------------------------------------------------------------------------------------------------------------------------------------------------------------------------------------------------------------------------------------------------------------------------------------------------------------------------------------------------------------------------------------------------------------------------------------------------------------------------------------------------------------------------------------------------------------------------------------------------------------------------------------------------------------------------------------------------------------------------------------------------------------------------------------------------------------------------------------------------------------------------------------------------------------------------------------------------------------------------------------------------------------------------------------------------------------------------------------------------------------------------------------------------------------------------------------------------------------------------|
|                   | 42858080401, 42858080501, 49999084830, 51862018501, 51862018601, 51862018701, 51862018801, 51862061501, 51862061701, 51927100000, 54023524, 54023525, 54023624, 54023625, 54023749, 54023763, 54023849, 54023863, 54040444, 54051741, 54051744, 54051750, 54868319105, 574711212, 60687061701, 60687061711, 63275102504, 63304045001, 63304045101, 63304045201, 63304045301, 63304075801, 63323045100, 63323045101, 63323045200, 63323045201, 63323045400, 63323045401, 63323045500, 63629108701, 63629108801, 63629845901, 63629846001, 641601901, 641601910, 641602001, 641602010, 641603901, 641604001, 641607025, 641612501, 641612525, 641612601, 641612701, 641612725, 641619101, 641619210, 66794016002, 67877067001, 67877067101, 68084015701, 68084015711, 68084015801, 68094004501, 68094004558, 69374097902, 70092113343, 70092152350, 70092153643, 72162178901, 72162179009, 72162179306, 72572044001, 72572044025, 73177010501, 75826012905, 75826012917, 75826013101, 75826013104, 76045000401, 76045000410, 76045000411, 76045000501, 76045000510, 76045000511, 76045000610, 76045000710, 76045000810, 76045000811, 76329191101, 8065350, 8065702, 81371106201, 832022500, 832022600, 832022700, 832022800, 832022900, 832023000, 832023300, 832027311, 832027411, 904655761, 904655861, 904655961                                                                                                                                                                                                                                                                                                                                                                                                                                                                                                                                                                                                                                                                                                                                                                                                                                                                                                                                                                                                                                                                                                                                                                     |
| <b>Nalbuphine</b> | 409146301, 409146349, 409146371, 409146401, 409146461, 409146701, 409146761, 54868360800, 70069067101, 70069067110                                                                                                                                                                                                                                                                                                                                                                                                                                                                                                                                                                                                                                                                                                                                                                                                                                                                                                                                                                                                                                                                                                                                                                                                                                                                                                                                                                                                                                                                                                                                                                                                                                                                                                                                                                                                                                                                                                                                                                                                                                                                                                                                                                                                                                                                                                                                                                    |
| <b>Oxycodone</b>  | 10702000801, 10702000850, 10702000901, 10702000950, 10702001801, 10702001850, 10702002301, 10702005601, 10702005650, 10702005701, 10702005750, 10702018401, 10702018501, 10702018550, 10702018601, 10702018701, 10702018750, 10702080101, 10702080301, 115155801, 115156001, 121082601, 121482705, 13107004401, 13107004405, 13107004501, 13107004505, 13107004601, 13107004605, 13107005501, 13107005601, 13107005701, 16590061960, 23635058110, 23635058210, 24510011010, 24510011510, 24510012010, 24510013010, 24510014010, 29033040535, 31722010901, 31722011001, 31722011101, 31722019101, 31722019205, 31722019301, 31722019401, 31722091701, 31722091705, 31722091801, 31722091805, 31722094801, 31722094901, 31722094905, 31722095001, 31722095005, 31722095101, 31722095105, 33261019606, 339407112, 35356080130, 35356083930, 378710401, 378710601, 406051201, 406051205, 406051223, 406051262, 406052201, 406052205, 406052223, 406052262, 406052301, 406052305, 406052323, 406052362, 406055201, 406055223, 406055262, 406056201, 406851001, 406851023, 406851062, 406851501, 406851523, 406851562, 406852001, 406853001, 406853062, 406855605, 406855730, 42806000501, 42806000601, 42806000701, 42858000101, 42858000110, 42858000201, 42858000210, 42858000301, 42858000401, 42858000501, 42858010201, 42858010250, 42858010301, 42858010350, 42858010401, 42858010450, 43063065340, 43386043001, 43386043201, 43386043301, 43386049305, 47781019601, 47781019605, 47781022901, 47781022905, 47781023001, 47781023005, 47781023063, 47781026301, 47781026305, 47781026401, 47781026405, 47781026501, 47781026505, 49884013701, 49999085105, 49999085405, 49999085460, 50268064411, 50268064415, 50268064611, 50268064615, 50383096134, 50383096430, 527166905, 527167105, 527177401, 53746020301, 53746020305, 53746020401, 53746020405, 54039041, 54039063, 54055125, 54868471000, 54868539008, 55048056230, 55700049801, 55700055730, 57664015588, 57664018788, 57664022388, 57664037088, 57866993601, 59011041010, 59011041020, 59011041510, 59011041520, 59011042010, 59011042020, 59011043010, 59011043020, 59011044010, 59011044020, 59011046010, 59011046020, 59011048010, 59011048020, 591269301, 591270801, 603497821, 603498221, 603499828, 60429051601, 60429051701, 60432070605, 60687040667, 60687064201, 60687064211, 60951060270, 60951060285, 60951070070, 60951070170, 60951071270, 61919087130, 62559015116, 62559016701, 63481062370, 63481062870, |

| Opioid family      | NDC/CPT/HCPCS |              |              |              |              |              |
|--------------------|---------------|--------------|--------------|--------------|--------------|--------------|
|                    | 63481062970,  | 63629117401, | 63629190901, | 63629191001, | 63629191101, | 63629194201, |
|                    | 63629377401,  | 63629386102, | 63629418403, | 63629418407, | 63629460603, | 64380025901, |
|                    | 64380026001,  | 64380026101, | 64380026201, | 64380026301, | 64850062101, | 64850062201, |
|                    | 64850062301,  | 64950035405, | 64950035445, | 64950035450, | 64950035455, | 65162004710, |
|                    | 65162004750,  | 65162004810, | 65162004910, | 65162004950, | 65162005010, | 65162005110, |
|                    | 65162005150,  | 65162020350, | 65162020710, | 65162020750, | 66591091332, | 66689002530, |
|                    | 66689040101,  | 66689040316, | 68084004811, | 68084035401, | 68084035411, | 68084035501, |
|                    | 68084035511,  | 68084069901, | 68084069911, | 68084071001, | 68084071011, | 68084096801, |
|                    | 68084096811,  | 68084097501, | 68084098301, | 68094000561, | 68308002003, | 68308014501, |
|                    | 68308040547,  | 68308047547, | 68308048047, | 68382079601, | 68462020401, | 69238229401, |
|                    | 69238229601,  | 69238229801, | 69238230001, | 69344011311, | 69344021311, | 70010066801, |
|                    | 70010066901,  | 70010067001, | 70752013614, | 70752013703, | 71335142102, | 71335142109, |
|                    | 71335142201,  | 71335142202, | 71335142203, | 71335142204, | 71930002243, | 71930002330, |
|                    | 71930004512,  | 71930004552, | 71930004612, | 71930004652, | 71930004712, | 71930004752, |
|                    | 72189009490,  | 72189009530, | 72245019310, | 72245068110, | 72245068210, | 72245068303, |
|                    | 72245068310,  | 72865011401, | 72865012801, | 72865012901, | 72887068103, | 72887068203, |
|                    | 72887068303,  | 73780000110, | 73780000210, | 76420013630, | 781572601,   | 81140010110, |
|                    | 81140010210,  | 81140010410, | 904643761,   | 904643961,   | 904659061,   | 904667840,   |
|                    | 904682894,    | 904696661,   | 904709361,   | 904709461,   | 904709561,   | 904718061,   |
|                    | 93573101,     | 93573201,    | 93573301,    | 93573401     |              |              |
| <b>Oxymorphone</b> | 10702007001,  | 10702007006, | 10702007101, | 10702007106, | 13107010301, | 13107010401, |
|                    | 16590076756,  | 31722092901, | 31722093001, | 54028325,    | 54028425,    | 63481061275, |
|                    | 64896069501,  | 64896069513, | 64896069601, | 64896069613, | 64896069701, | 64896069713, |
|                    | 64896069801,  | 64896069813, | 64896069901, | 64896069913, | 64896070001, | 64896070013, |
|                    | 64896070101,  | 64896070113  |              |              |              |              |
| <b>Pentazocine</b> | 43386068001,  | 591039501,   | 60346066040, | 63874022035  |              |              |
| <b>Tapentadol</b>  | 24510005010,  | 24510005860, | 24510007510, | 24510010010, | 24510011660, | 24510017460, |
|                    | 24510023260,  | 24510029160, | 35356052530, | 35356059330, | 50458082002, | 69865022002  |
| <b>Tramadol</b>    | 10135051905,  | 10147090103, | 10370022211, | 12634094060, | 13811068930, | 13811069030, |
|                    | 13811069130,  | 16571071601, | 16571071610, | 16571071650, | 16590089228, | 16714048102, |
|                    | 185031110,    | 21695013278, | 23490758602, | 29300035501, | 29300035505, | 29300035510, |
|                    | 33261010560,  | 33342020111, | 33358034220, | 33358034290, | 35356065915, | 35356065918, |
|                    | 35356065930,  | 378415101,   | 378415105,   | 378415293,   | 378808801,   | 378808805,   |
|                    | 42549056930,  | 42571011901, | 43063078220, | 43353007220, | 43353007224, | 43353007230, |
|                    | 43353007240,  | 43353007246, | 43353007267, | 43353007270, | 43353007272, | 43353007280, |
|                    | 43353007292,  | 440857091,   | 47335053183, | 47335053188, | 47335053383, | 47335053388, |
|                    | 47335053783,  | 47335053788, | 47335085983, | 47335086083, | 47335086183, | 50090080601, |
|                    | 50090324801,  | 50090578900, | 50436013602, | 50436037702, | 50436037703, | 50436037705, |
|                    | 50436878702,  | 50436878705, | 50436878707, | 51079099101, | 51079099120, | 51407000701, |
|                    | 51407000705,  | 52817019500, | 52817019610, | 52817061516, | 52959068821, | 52959068856, |
|                    | 53746061701,  | 53746061705, | 53746061710, | 54569408901, | 54868463801, | 55045335002, |
|                    | 55289071930,  | 55700002930, | 55700041218, | 57664037708, | 57664037713, | 57664037718, |
|                    | 57664053718,  | 57664053788, | 60219234801, | 60219234805, | 60219234807, | 60429058801, |
|                    | 60429058805,  | 60687079501, | 60687079511, | 60760031990, | 60760037709, | 60760037720, |
|                    | 60760037790,  | 60760037798, | 60760058890, | 60760062290, | 61919007330, | 61919007360, |
|                    | 61919022950,  | 61919059740, | 63187006315, | 63187006320, | 63187006378, | 63629286804, |
|                    | 63629286806,  | 63629489904, | 63629489905, | 63739067110, | 64980061401, | 64980061450, |
|                    | 64980066301,  | 65162062710, | 65162062711, | 65162062750, | 65862092201, | 65862092205, |
|                    | 66267056315,  | 66267056330, | 66267056345, | 66267056360, | 66267056392, | 66267084306, |
|                    | 66869056435,  |              |              |              |              |              |

| Opioid family | NDC/CPT/HCPCS                                                                                                                                                                                                                                                                                                                                                                                                                                                                                                                                                                                                                                                                                                                                                                                                                                                                                                                                                                                                                                                                                                                                                        |
|---------------|----------------------------------------------------------------------------------------------------------------------------------------------------------------------------------------------------------------------------------------------------------------------------------------------------------------------------------------------------------------------------------------------------------------------------------------------------------------------------------------------------------------------------------------------------------------------------------------------------------------------------------------------------------------------------------------------------------------------------------------------------------------------------------------------------------------------------------------------------------------------------------------------------------------------------------------------------------------------------------------------------------------------------------------------------------------------------------------------------------------------------------------------------------------------|
|               | 66869056490, 68071514206, 68084080801, 68084080811, 68180069706, 68180069806, 68180069906, 68382033405, 68387090030, 68387090050, 68788692901, 68788732107, 68788949106, 69150002010, 69543013610, 69543013611, 69543013650, 71093011904, 71093011905, 71093011906, 71205006660, 71205006690, 71205030315, 71205030340, 71205074015, 71335052105, 71335061901, 71335061902, 71335149803, 71335149805, 71610000615, 71610000620, 71610000624, 71610000628, 71610000630, 71610000645, 71610000646, 71610000653, 71610000654, 71610000660, 71610000667, 71610000670, 71610000672, 71610000673, 71610000675, 71610000680, 71610000685, 71610000690, 71610039240, 71610039253, 71610039257, 71610039270, 71610039820, 71610039845, 71610039853, 71610039854, 71610039860, 71610039865, 71610039872, 71610039880, 71610039890, 71610086524, 71610086528, 71610086530, 71610086553, 71610086554, 71610086560, 71610086570, 71610086573, 71610086580, 71610086590, 72888000801, 72888000800, 72888008001, 72888008005, 72888016230, 72888016330, 76420020560, 76420020590, 80425015906, 80425027608, 904636561, 904717961, 904749661, 93005801, 93005805, 93330101, 93330105 |

**Medical Claims**

|                      |                     |
|----------------------|---------------------|
| <b>Buprenorphine</b> | J0571, J0592, G2079 |
| <b>Codeine</b>       | J0745               |
| <b>Fentanyl</b>      | J3010, J0216, J1810 |
| <b>Hydromorphone</b> | J1170               |
| <b>Meperidine</b>    | J2175, J2180        |
| <b>Methadone</b>     | J1230, G2078        |
| <b>Morphine</b>      | J2270, J2272, J2274 |
| <b>Nalbuphine</b>    | J2300               |

**Abbreviation:** CPT, Current Procedural Terminology; HCPCS, Healthcare Common Procedure Coding System; NDC, National Drug Codes.

**Supplementary Table 23.** Opioid conversion factors used to calculate oral Morphine Milligram Equivalents (MMEs).

| <b>Opioid</b>             | <b>Route of administration</b> | <b>Conversion factor</b> | <b>Reference</b> |
|---------------------------|--------------------------------|--------------------------|------------------|
| <b>Codeine (mg)</b>       | Oral                           | 0.15                     | 6,7              |
| <b>Buprenorphine (mg)</b> | IV                             | 75                       | 5                |
|                           | Transdermal                    | 2.2                      | 6                |
| <b>Fentanyl (mcg)</b>     | IV                             | 0.2                      | 5                |
| <b>Hydrocodone (mg)</b>   | Oral                           | 1                        | 6,7              |
| <b>Hydromorphone (mg)</b> | Oral                           | 5                        | 6,7              |
|                           | IV                             | 17.5                     | 5                |
| <b>Meperidine (mg)</b>    | IV                             | 0.4                      | 5                |
| <b>Methadone (mg)</b>     | Oral                           | 4.7                      | 6,7              |
|                           | IV                             | 13.5                     | 5                |
| <b>Morphine (mg)</b>      | Oral                           | 1                        | 6,7              |
|                           | IV                             | 3                        | 5                |
| <b>Nalbuphine (mg)</b>    | IV                             | 3                        | 5                |
| <b>Oxycodone (mg)</b>     | Oral                           | 1.5                      | 6,7              |
| <b>Tramadol (mg)</b>      | Oral                           | 0.2                      | 6,7              |

**Abbreviation:** IV, intravenous; mg, milligram; mcg, microgram.

**Supplementary Table 24.** Classification of opioid medications by potency relative to morphine and U.S. Drug Enforcement Administration (DEA) schedule.

| <b>Opioids</b>                                         |                                                                                  |
|--------------------------------------------------------|----------------------------------------------------------------------------------|
| <b>Opioid potency relative to morphine<sup>1</sup></b> |                                                                                  |
| Lower potency than morphine                            | Codeine, Meperidine, Tramadol                                                    |
| Equivalent to morphine                                 | Hydrocodone, Morphine                                                            |
| Greater potency than morphine                          | Buprenorphine, Fentanyl, Hydromorphone, Methadone, Oxycodone                     |
| <b>DEA schedule classification<sup>2</sup></b>         |                                                                                  |
| Schedule IV                                            | Tramadol                                                                         |
| Schedule III                                           | Buprenorphine, Codeine                                                           |
| Schedule II                                            | Fentanyl, Hydrocodone, Hydromorphone, Meperidine, Methadone, Morphine, Oxycodone |

**Abbreviation:** DEA, U.S. Drug Enforcement Administration.

**Notes:** <sup>1</sup>Drug potency relative to morphine considering published equianalgesic dose conversion factors<sup>5-7</sup>. <sup>2</sup>Drug schedule categorized according to the U.S. DEA controlled substance schedules<sup>8,9</sup>

**Supplementary Table 25.** Negative control drugs and associated National Drug Codes (NDC).

| Negative control | NDC                                                                                                                                                                                                                                                                                                                                                                                                                                                                                                                                                                                                                                                                                                                                                                                                                                                                                                                                                                                                                                                                                                                                                                                                                                                                                                                                                                                                                                                                                                                                                                                                                                                                                                                                                                                                                                                                                                                                                                                                                                                                                                                                                                                                                                                                                                                                                                                                                                                                                                                                                                                                                                                                                                                                                                                                                                                                                                                                                                                                                                                                                                                                                                                                                                                                                                                                                                                                                                                                                                                                                                                                                                                                                                                                                                                                                                                                                         |
|------------------|---------------------------------------------------------------------------------------------------------------------------------------------------------------------------------------------------------------------------------------------------------------------------------------------------------------------------------------------------------------------------------------------------------------------------------------------------------------------------------------------------------------------------------------------------------------------------------------------------------------------------------------------------------------------------------------------------------------------------------------------------------------------------------------------------------------------------------------------------------------------------------------------------------------------------------------------------------------------------------------------------------------------------------------------------------------------------------------------------------------------------------------------------------------------------------------------------------------------------------------------------------------------------------------------------------------------------------------------------------------------------------------------------------------------------------------------------------------------------------------------------------------------------------------------------------------------------------------------------------------------------------------------------------------------------------------------------------------------------------------------------------------------------------------------------------------------------------------------------------------------------------------------------------------------------------------------------------------------------------------------------------------------------------------------------------------------------------------------------------------------------------------------------------------------------------------------------------------------------------------------------------------------------------------------------------------------------------------------------------------------------------------------------------------------------------------------------------------------------------------------------------------------------------------------------------------------------------------------------------------------------------------------------------------------------------------------------------------------------------------------------------------------------------------------------------------------------------------------------------------------------------------------------------------------------------------------------------------------------------------------------------------------------------------------------------------------------------------------------------------------------------------------------------------------------------------------------------------------------------------------------------------------------------------------------------------------------------------------------------------------------------------------------------------------------------------------------------------------------------------------------------------------------------------------------------------------------------------------------------------------------------------------------------------------------------------------------------------------------------------------------------------------------------------------------------------------------------------------------------------------------------------------|
| <b>Metformin</b> | 64764015860, 45802016972, 45802021172, 50090599300, 66993036160, 66993036230, 93745501, 93745601, 93745701, 378313301, 23155011501, 23155011601, 23155011701, 62135073360, 68382018401, 68382018501, 68382018601, 87606005, 87606313, 87606413, 87607005, 87607111, 55045250401, 49999066030, 68012000316, 68012000450, 228275250, 23155023301, 23155023401, 23155023501, 23155023505, 51138047330, 57237002301, 57237002401, 57237002405, 57237002501, 57237002505, 65862008001, 65862008005, 65862008101, 65862008105, 65862008201, 65862008205, 50458054060, 50458054160, 50458054260, 50458054360, 50458094001, 50458094101, 50458094201, 50458094301, 6007861, 6007862, 6007882, 6008061, 6008062, 6008082, 6008131, 6008154, 6008182, 6057561, 6057562, 6057582, 6057761, 6057762, 6057782, 597014618, 597014660, 597014718, 597014760, 597014818, 597014860, 597014860, 597027073, 597027094, 597027533, 597027581, 64764033560, 64764033760, 310612560, 310613530, 310614595, 72205040701, 72205040802, 72205040901, 93104801, 93721201, 93726701, 93726710, 378035001, 378035205, 378600191, 378600291, 378718505, 378718605, 378718705, 591241101, 591241219, 591272060, 603446921, 904668961, 904669161, 904716261, 904716361, 904716461, 10544024802, 10544052130, 11788003760, 23155010201, 23155010205, 23155010206, 23155010209, 23155010210, 23155010301, 23155010305, 23155010309, 23155010310, 23155010401, 23155010405, 23155010409, 23155010410, 23155084101, 23155084105, 23155084110, 23155084201, 23155084205, 23155084210, 23155084301, 23155084305, 23155084310, 24658029218, 24658079010, 24658079105, 24658079205, 24979014604, 24979015304, 25000010112, 25000010212, 27241018860, 27241018960, 27241024001, 27241024190, 29033003106, 29033003206, 29033005501, 29033005601, 29300038901, 29300038905, 29300039901, 31722004247, 33342023911, 38779212605, 42291049710, 42291049718, 42291049736, 42291049750, 42291049790, 42291049801, 42291049818, 42291049850, 42291059318, 42291061001, 42291082450, 42291082490, 42291082510, 42291082512, 42291082518, 42291082536, 42291082590, 42385090210, 42385090410, 42385094701, 42385094705, 42385094711, 42385094801, 42385094805, 42385094811, 42385094901, 42385094905, 42385094911, 42385097701, 42385097705, 42385097711, 42385097790, 42385097801, 42571033301, 42571033490, 42571036007, 42571036010, 42806021305, 42806031305, 42806031505, 42806040660, 42806063201, 42806063205, 42806063301, 43353008260, 43353008280, 43353008292, 43353008296, 43353089430, 43353098230, 43353098253, 43353098260, 43353098270, 43353098280, 43353098296, 43353098730, 43353098745, 43353098753, 43353098760, 43353098773, 43353098780, 43353098786, 43353098796, 43547035950, 47335030588, 47335030688, 49483062001, 49483062010, 49483062081, 49483062110, 49483062181, 49483062201, 49483062210, 49483062250, 49483062281, 49483062301, 49483062309, 49483062310, 49483062350, 49483062401, 49483062450, 49999010660, 50090208104, 50090305002, 50090505200, 50090685603, 50090685805, 50090685806, 50228010501, 50228010505, 50228010510, 50228010530, 50228010601, 50228010605, 50228010701, 50228010705, 50228010710, 50228010730, 50228044501, 50228044690, 50228050460, 50742015405, 50742015490, 50742015501, 50742063360, 50742063460, 51079017201, 51224000750, 51224000760, 51224002050, 51224002060, 51224002070, 51224010750, 51224010760, 51224012050, 51224012060, 51224012070, 51224022050, 51224022060, 51224022070, 51991080605, 51991080705, 52817082050, 53002142200, 53746017805, 53746017810, 53746021801, 55289061590, 55700066990, 57664039751, 57664039753, 57664039758, 57664039788, 57664043551, 57664043553, 57664043558, 57664047451, 57664047453, 57664047458, 57664047488, 59651004260, 59651004360, 59651085401, 59651085405, 59651085499, 59651085501, 59651085505, 59651085601, |

| Negative control                                                                                                                                                                                                                                                                                                                                                                                                                                                                                                                                                                                                                                                                                                                                                                                                                                                                                                                                                                                                                                                                                                                                                                                                                                                                                                                                                                                                                                                                                                                                                                                                                                                                                                                                                                                                                                                                                                                                                                                                                                                                                                                                                                                                                                                                                                                                                                                                                                                                                                                                                                                                                                                                                                                                                                                                                                                                                                                                                                                                                                                                                                                                                                                                                                                                                                                                                                                                                                                                                                                                                                                                                                                                                                                                                                                                                                                                                                                                                                                   | NDC                                                                                                                                                                                                                                           |  |  |  |  |  |
|----------------------------------------------------------------------------------------------------------------------------------------------------------------------------------------------------------------------------------------------------------------------------------------------------------------------------------------------------------------------------------------------------------------------------------------------------------------------------------------------------------------------------------------------------------------------------------------------------------------------------------------------------------------------------------------------------------------------------------------------------------------------------------------------------------------------------------------------------------------------------------------------------------------------------------------------------------------------------------------------------------------------------------------------------------------------------------------------------------------------------------------------------------------------------------------------------------------------------------------------------------------------------------------------------------------------------------------------------------------------------------------------------------------------------------------------------------------------------------------------------------------------------------------------------------------------------------------------------------------------------------------------------------------------------------------------------------------------------------------------------------------------------------------------------------------------------------------------------------------------------------------------------------------------------------------------------------------------------------------------------------------------------------------------------------------------------------------------------------------------------------------------------------------------------------------------------------------------------------------------------------------------------------------------------------------------------------------------------------------------------------------------------------------------------------------------------------------------------------------------------------------------------------------------------------------------------------------------------------------------------------------------------------------------------------------------------------------------------------------------------------------------------------------------------------------------------------------------------------------------------------------------------------------------------------------------------------------------------------------------------------------------------------------------------------------------------------------------------------------------------------------------------------------------------------------------------------------------------------------------------------------------------------------------------------------------------------------------------------------------------------------------------------------------------------------------------------------------------------------------------------------------------------------------------------------------------------------------------------------------------------------------------------------------------------------------------------------------------------------------------------------------------------------------------------------------------------------------------------------------------------------------------------------------------------------------------------------------------------------------------|-----------------------------------------------------------------------------------------------------------------------------------------------------------------------------------------------------------------------------------------------|--|--|--|--|--|
| 59651085605, 59651085699, 60429011101, 60429011110, 60429011136, 60429011145,<br>60429011205, 60429011218, 60429011227, 60429011260, 60429011301, 60429011305,<br>60429011318, 60505026001, 60505470001, 60505470109, 60687014301, 60687015501,<br>60687015511, 60687016201, 60687016211, 60760052360, 61442036110, 61442036301,<br>62037057110, 62135068005, 62135068130, 62135068230, 62135068418, 62584025901,<br>62756014201, 62756014202, 62756014301, 62991304901, 63629139704, 63629139705,<br>63629914701, 65862000801, 65862000805, 65862000899, 65862000901, 65862000905,<br>65862001001, 65862001005, 65862001046, 65862001099, 65862029101, 65862029105,<br>66336088414, 66689031816, 67877015901, 67877015905, 67877015910, 67877041301,<br>67877041305, 67877041390, 67877041401, 67877056101, 67877056105, 67877056110,<br>67877056201, 67877056205, 67877056210, 67877056301, 67877056305, 67877056310,<br>68094048060, 68094048070, 68094068860, 68094068870, 68094080450, 68094080460,<br>68094090450, 68094090460, 68180033607, 68180033707, 68180033801, 68180033909,<br>68382075801, 68382075805, 68382075810, 68382075901, 68382075905, 68382075910,<br>68382076001, 68382076005, 68382076010, 68462052001, 68462052190, 68645030059,<br>68645054459, 68645054559, 68645054759, 68645058259, 68645058359, 68645058459,<br>68645059559, 68682001890, 68682002150, 68788720409, 69238212601, 69315041001,<br>69315041005, 69367018001, 69367018005, 69367018010, 69367018101, 69367018105,<br>69367018201, 69367018205, 69367018210, 69367038101, 69367038105, 69367038110,<br>69367038205, 69367038301, 69367038305, 69367038310, 69452038088, 70010006301,<br>70010006305, 70010006309, 70010006310, 70010006401, 70010006405, 70010006409,<br>70010006410, 70010006499, 70010006501, 70010006505, 70010006509, 70010006510,<br>70010006599, 70010049101, 70010049105, 70010049109, 70010049110, 70010049201,<br>70010049210, 70010049601, 70010049709, 70934013630, 71093013204, 71093013205,<br>71093013206, 71093013305, 71093013404, 71093013405, 71205088260, 71205088478,<br>71335029304, 71335128902, 71335128903, 71335183301, 71335183308, 71610021080,<br>71610044153, 71610045453, 71610045760, 71610045770, 71610045792, 71610045794,<br>71610046760, 71610055430, 71610055453, 71610055460, 71610055470, 71610055480,<br>71610055494, 71610057860, 71610058770, 71610058794, 71610061330, 71610061353,<br>71610061360, 71610061370, 71610061380, 71610065230, 71610065253, 71610065260,<br>71610065270, 71610065280, 71610065294, 71610066660, 71610066680, 71610067280,<br>71610074053, 71610074080, 71610083730, 71610083753, 71610083760, 71610083770,<br>71610083794, 71610085830, 71610085853, 71610085860, 71610085870, 71610085880,<br>71610085894, 71610086753, 71610086780, 71610092080, 71610092392, 71656001704,<br>71717010611, 72336006430, 72336009530, 72578003601, 72789009730, 72789010590,<br>72789010593, 72789010595, 72789010601, 72789010682, 72789010690, 72789010693,<br>72789040060, 72789040090, 75834050001, 75834050005, 76385012810, 76385012901,<br>82009004610, 82009004710, 83301000801, 83301000802, 83301000803, 83301000902,<br>83301000903, 83301001001, 83301001002, 83301001003, 67877093001, 67877093005,<br>67877093101, 67877093205, 10135082305, 82009011710, 82009011801, 71610094160,<br>13668028160, 33342017609, 33342017657, 33342017709, 33342017757, 57237021760,<br>57237021860, 65862052518, 65862052560, 65862052618, 65862052660, 10631001917,<br>10631020601, 378817593, 378817691, 378817793, 43598061860, 43598061930,<br>43598062030, 6536903, 6536906, 6537003, 6537006, 6537303, 6537306, 6537403,<br>6537406, 70710198606, 70710198706, 597015918, 597015960, 597016818, 597016860,<br>597017518, 597017560, 597018018, 597018060, 597028073, 597028090, 597029059,<br>597029074, 597029578, 597029588, 597030045, 597030093, 310622560, 310625030,<br>310626060, 310627030, 310628030, 70710178706 |                                                                                                                                                                                                                                               |  |  |  |  |  |
| <b>Simvastatin</b>                                                                                                                                                                                                                                                                                                                                                                                                                                                                                                                                                                                                                                                                                                                                                                                                                                                                                                                                                                                                                                                                                                                                                                                                                                                                                                                                                                                                                                                                                                                                                                                                                                                                                                                                                                                                                                                                                                                                                                                                                                                                                                                                                                                                                                                                                                                                                                                                                                                                                                                                                                                                                                                                                                                                                                                                                                                                                                                                                                                                                                                                                                                                                                                                                                                                                                                                                                                                                                                                                                                                                                                                                                                                                                                                                                                                                                                                                                                                                                                 | 115138702, 16714077801, 16714077802, 16714077901, 16714077902, 16714078001,<br>16714078002, 16714078101, 16714078102, 43598058330, 43598074210, 43598074230,<br>43598074290, 43598074305, 43598074330, 43598074390, 43598074410, 43598074430, |  |  |  |  |  |

| Negative control | NDC          |              |              |              |              |              |
|------------------|--------------|--------------|--------------|--------------|--------------|--------------|
|                  | 43598074490, | 43598074505, | 43598074530, | 43598074590, | 45963056608, | 45963056630, |
|                  | 45963056708, | 45963056730, | 51407019230, | 62559070030, | 62559070090, | 62559070130, |
|                  | 62559070190, | 62559070230, | 62559070290, | 62559070330, | 67877050730, | 67877050790, |
|                  | 67877050830, | 67877050890, | 67877050930, | 67877050990, | 67877051030, | 67877051090, |
|                  | 68462032130, | 68462032190, | 68462032230, | 68462032290, | 68462032330, | 68462032390, |
|                  | 68462032430, | 68462032490, | 69238115503, | 69238115603, | 69238115609, | 69238115703, |
|                  | 69238115803, | 29273040104, | 93715410,    | 93715619,    | 16714068101, | 16714068102, |
|                  | 16714068201, | 16714068202, | 16714068203, | 16714068301, | 16714068302, | 16714068303, |
|                  | 16714068401, | 16714068402, | 16714068403, | 16714068501, | 16714068502, | 16714068503, |
|                  | 16729000415, | 16729000417, | 16729000510, | 16729000515, | 16729000517, | 16729000610, |
|                  | 16729000615, | 16729000617, | 16729000715, | 16729000717, | 16729015615, | 16729015617, |
|                  | 24658050010, | 24658050090, | 24658050110, | 24658050130, | 24658050145, | 24658050190, |
|                  | 24658050210, | 24658050230, | 24658050245, | 24658050290, | 24658050310, | 24658050330, |
|                  | 24658050345, | 24658050390, | 24658050410, | 24658050445, | 24658050490, | 31722051010, |
|                  | 31722051090, | 31722051110, | 31722051210, | 31722051310, | 31722051390, | 43353086115, |
|                  | 47463077430, | 52343002299, | 52343002330, | 52343002345, | 52343002399, | 52343002430, |
|                  | 52343002499, | 52343002599, | 54868562903, | 55111019790, | 55111019805, | 55111019830, |
|                  | 55111019890, | 55111019905, | 55111019910, | 55111019990, | 55111020005, | 55111020030, |
|                  | 55111020090, | 55111026830, | 55111026890, | 60687021001, | 60687021011, | 61919071090, |
|                  | 63304079330, | 63629338502, | 63739057010, | 63739057110, | 63739057210, | 63739057310, |
|                  | 65862005030, | 65862005090, | 65862005130, | 65862005190, | 65862005199, | 65862005230, |
|                  | 65862005290, | 65862005299, | 65862005330, | 65862005390, | 65862005399, | 65862005430, |
|                  | 65862005490, | 68084051101, | 68084051111, | 68084051201, | 68084051211, | 68180046403, |
|                  | 68180046406, | 68180046409, | 68180046503, | 68180046506, | 68180046509, | 68180047801, |
|                  | 68180047802, | 68180047803, | 68180047901, | 68180047902, | 68180047903, | 68382006516, |
|                  | 68645047054, | 68645052754, | 68788743703, | 70377000114, | 70377000115, | 70377000214, |
|                  | 70377000215, | 70377000312, | 70377000314, | 70377000315, | 70377000412, | 70377000414, |
|                  | 70377000415, | 70377000514, | 70377000515, | 71610060945, | 71610061045, | 71610061145, |
|                  | 71610061545, | 82009001210, | 82009001310, | 82009001410, | 82009001510, | 82009001605, |
|                  | 78206017401, | 78206017501, | 78206017502, | 78206017601, | 78206017602, | 6054331,     |
|                  | 6073531,     | 6074031,     | 6074931,     | 78206018001, | 78206018002, | 78206018101, |
|                  | 78206018102, | 78206018201, | 78206018202  |              |              |              |

**Abbreviation:** NDC, National Drug Codes.

## Supplementary References

- 1 Areias, A. C. *et al.* The potential of a multimodal digital care program in addressing healthcare inequities in musculoskeletal pain management. *npj Digital Medicine* **6**, 188 (2023). <https://doi.org/10.1038/s41746-023-00936-2>
- 2 Robert Graham Center - Policy Studies in Family Medicine & Primary Care. Social deprivation index (SDI). 2018, November 5. Available from: <https://www.graham-center.org/maps-data-tools/social-deprivation-index.html>. Accessed July 3rd, 2025.
- 3 Austin, S. R., Wong, Y. N., Uzzo, R. G., Beck, J. R. & Egleston, B. L. Why Summary Comorbidity Measures Such As the Charlson Comorbidity Index and Elixhauser Score Work. *Med Care* **53**, e65–72 (2015). <https://doi.org/10.1097/MLR.0b013e318297429c>
- 4 Prommik, P. *et al.* Simple Excel and ICD-10 based dataset calculator for the Charlson and Elixhauser comorbidity indices. *BMC Med Res Methodol* **22**, 4 (2022). <https://doi.org/10.1186/s12874-021-01492-7>
- 5 Nielsen, S., Degenhardt, L., Hoban, B. & Gisev, N. A synthesis of oral morphine equivalents (OME) for opioid utilisation studies. *Pharmacoepidemiology and Drug Safety* **25**, 733–737 (2016). <https://doi.org/https://doi.org/10.1002/pds.3945>
- 6 Adams, M. C. B., Sward, K. A., Perkins, M. L. & Hurley, R. W. Standardizing research methods for opioid dose comparison: the NIH HEAL morphine milligram equivalent calculator. *PAIN* **166** (2025).

- 7 Dowell D, Ragan KR, Jones CM, Baldwin GT, Chou R. CDC Clinical Practice Guideline for Prescribing Opioids for Pain — United States, 2022. *MMWR Recomm Rep* 2022;71(No. RR-3):1–95. DOI: <http://dx.doi.org/10.15585/mmwr.rr7103a1>.
- 8 Manchikanti, L. *et al.* Comprehensive, Evidence-Based, Consensus Guidelines for Prescription of Opioids for Chronic Non-Cancer Pain from the American Society of Interventional Pain Physicians (ASIPP). *Pain Physician* **26**, S7–s126 (2023).
- 9 U.S. Drug Enforcement Administration (DEA). Drug Scheduling. Available from: <https://www.dea.gov/drug-information/drug-scheduling>. Accessed March 26th 2026.
- 10 Motheral, B. *et al.* A checklist for retrospective database studies--report of the ISPOR Task Force on Retrospective Databases. *Value Health* **6**, 90–97 (2003). <https://doi.org/10.1046/j.1524-4733.2003.00242.x>
- 11 Tyree, P. T., Lind, B. K. & Lafferty, W. E. Challenges of Using Medical Insurance Claims Data for Utilization Analysis. *Quality Assurance and Utilization Review* **21**, 269–275 (2006). <https://doi.org/10.1177/1062860606288774>
